# Supplementary material for: Erythrocyte Stress Index Promotes The Development of Type 2 Diabetes To Heart Failure: Result From Two Cohorts
Source: Research Square preprint supplement (doi:10.21203/rs.3.rs-7492293/v1), 2025-12-17
Supplement: Supplementary file 1 [file c6502858f604abbc496df800.docx]

**Erythrocyte** **Stress Index Promotes The Development of Type 2 Diabetes To Heart Failure: Result From Two Cohorts.**

**Contents**

[Table S1. The ICD code for T2D 2](#_Toc200362036)

[Table S2. The ICD code for HF 7](#_Toc200362037)

[Table S3. Baseline characteristics of MIMIC for T2D and T2D-HF patients 10](#_Toc200362038)

[Table S4. Baseline characteristics of TJHFIT for T2D and T2D-HF patients 12](#_Toc200362039)

[Table S5. Baseline characteristics for ESIQ in TJHFIT 14](#_Toc200362040)

[Table S6. The subgroup Cox regression of the T2D-derived HF patients in TJHFIT 16](#_Toc200362041)

[Table S7. The subgroup Cox regression of the T2D-derived HF patients in MIMIC 22](#_Toc200362042)

# Table S1. The ICD code for T2D

| ICD code | ICD version | Description |
| --- | --- | --- |
| 25000 | 9 | Diabetes mellitus without mention of complication, type II or unspecified type, not stated as uncontrolled. |
| 25002 | 9 | Diabetes mellitus without mention of complication, type II or unspecified type, uncontrolled. |
| 25010 | 9 | Diabetes with ketoacidosis, type II or unspecified type, not stated as uncontrolled. |
| 25012 | 9 | Diabetes with ketoacidosis, type II or unspecified type, uncontrolled. |
| 25020 | 9 | Diabetes with hyperosmolarity, type II or unspecified type, not stated as uncontrolled. |
| 25022 | 9 | Diabetes with hyperosmolarity, type II or unspecified type, uncontrolled. |
| 25030 | 9 | Diabetes with other coma, type II or unspecified type, not stated as uncontrolled. |
| 25032 | 9 | Diabetes with other coma, type II or unspecified type, uncontrolled. |
| 25040 | 9 | Diabetes with renal manifestations, type II or unspecified type, not stated as uncontrolled. |
| 25042 | 9 | Diabetes with renal manifestations, type II or unspecified type, uncontrolled. |
| 25050 | 9 | Diabetes with ophthalmic manifestations, type II or unspecified type, not stated as uncontrolled. |
| 25052 | 9 | Diabetes with ophthalmic manifestations, type II or unspecified type, uncontrolled. |
| 25060 | 9 | Diabetes with neurological manifestations, type II or unspecified type, not stated as uncontrolled. |
| 25062 | 9 | Diabetes with neurological manifestations, type II or unspecified type, uncontrolled. |
| 25070 | 9 | Diabetes with peripheral circulatory disorders, type II or unspecified type, not stated as uncontrolled. |
| 25072 | 9 | Diabetes with peripheral circulatory disorders, type II or unspecified type, uncontrolled. |
| 25080 | 9 | Diabetes with other specified manifestations, type II or unspecified type, not stated as uncontrolled. |
| 25082 | 9 | Diabetes with other specified manifestations, type II or unspecified type, uncontrolled. |
| 25090 | 9 | Diabetes with unspecified complication, type II or unspecified type, not stated as uncontrolled. |
| 25092 | 9 | Diabetes with unspecified complication, type II or unspecified type, uncontrolled. |
| E11 | 10 | Type 2 diabetes mellitus. |
| E110 | 10 | Type 2 diabetes mellitus with hyperosmolarity. |
| E1101 | 10 | Type 2 diabetes mellitus with hyperosmolarity with coma. |
| E111 | 10 | Type 2 diabetes mellitus with ketoacidosis. |
| E1110 | 10 | Type 2 diabetes mellitus with ketoacidosis without coma. |
| E1111 | 10 | Type 2 diabetes mellitus with ketoacidosis with coma. |
| E112 | 10 | Type 2 diabetes mellitus with kidney complications. |
| E1121 | 10 | Type 2 diabetes mellitus with diabetic nephropathy. |
| E1122 | 10 | Type 2 diabetes mellitus with diabetic chronic kidney disease. |
| E1129 | 10 | Type 2 diabetes mellitus with other diabetic kidney complications. |
| E113 | 10 | Type 2 diabetes mellitus with ophthalmic complications. |
| E1131 | 10 | Type 2 diabetes mellitus with unspecified diabetic retinopathy. |
| E11311 | 10 | Type 2 diabetes mellitus with unspecified diabetic retinopathy with macular edema. |
| E11319 | 10 | Type 2 diabetes mellitus with unspecified diabetic retinopathy without macular edema. |
| E1132 | 10 | Type 2 diabetes mellitus with mild nonproliferative diabetic retinopathy. |
| E11321 | 10 | Type 2 diabetes mellitus with mild nonproliferative diabetic retinopathy with macular edema. |
| E113211 | 10 | Type 2 diabetes mellitus with mild nonproliferative diabetic retinopathy with macular edema, right eye. |
| E113212 | 10 | Type 2 diabetes mellitus with mild nonproliferative diabetic retinopathy with macular edema, left eye. |
| E113213 | 10 | Type 2 diabetes mellitus with mild nonproliferative diabetic retinopathy with macular edema, bilateral. |
| E113219 | 10 | Type 2 diabetes mellitus with mild nonproliferative diabetic retinopathy with macular edema, unspecified eye. |
| E11329 | 10 | Type 2 diabetes mellitus with mild nonproliferative diabetic retinopathy without macular edema. |
| E113291 | 10 | Type 2 diabetes mellitus with mild nonproliferative diabetic retinopathy without macular edema, right eye. |
| E113292 | 10 | Type 2 diabetes mellitus with mild nonproliferative diabetic retinopathy without macular edema, left eye. |
| E113293 | 10 | Type 2 diabetes mellitus with mild nonproliferative diabetic retinopathy without macular edema, bilateral. |
| E113299 | 10 | Type 2 diabetes mellitus with mild nonproliferative diabetic retinopathy without macular edema, unspecified eye. |
| E1133 | 10 | Type 2 diabetes mellitus with moderate nonproliferative diabetic retinopathy. |
| E11331 | 10 | Type 2 diabetes mellitus with moderate nonproliferative diabetic retinopathy with macular edema. |
| E113311 | 10 | Type 2 diabetes mellitus with moderate nonproliferative diabetic retinopathy with macular edema, right eye. |
| E113312 | 10 | Type 2 diabetes mellitus with moderate nonproliferative diabetic retinopathy with macular edema, left eye. |
| E113313 | 10 | Type 2 diabetes mellitus with moderate nonproliferative diabetic retinopathy with macular edema, bilateral. |
| E113319 | 10 | Type 2 diabetes mellitus with moderate nonproliferative diabetic retinopathy with macular edema, unspecified eye. |
| E11339 | 10 | Type 2 diabetes mellitus with moderate nonproliferative diabetic retinopathy without macular edema. |
| E113391 | 10 | Type 2 diabetes mellitus with moderate nonproliferative diabetic retinopathy without macular edema, right eye. |
| E113392 | 10 | Type 2 diabetes mellitus with moderate nonproliferative diabetic retinopathy without macular edema, left eye. |
| E113393 | 10 | Type 2 diabetes mellitus with moderate nonproliferative diabetic retinopathy without macular edema, bilateral. |
| E113399 | 10 | Type 2 diabetes mellitus with moderate nonproliferative diabetic retinopathy without macular edema, unspecified eye. |
| E1134 | 10 | Type 2 diabetes mellitus with severe nonproliferative diabetic retinopathy. |
| E11341 | 10 | Type 2 diabetes mellitus with severe nonproliferative diabetic retinopathy with macular edema. |
| E113411 | 10 | Type 2 diabetes mellitus with severe nonproliferative diabetic retinopathy with macular edema, right eye. |
| E113412 | 10 | Type 2 diabetes mellitus with severe nonproliferative diabetic retinopathy with macular edema, left eye. |
| E113413 | 10 | Type 2 diabetes mellitus with severe nonproliferative diabetic retinopathy with macular edema, bilateral. |
| E113419 | 10 | Type 2 diabetes mellitus with severe nonproliferative diabetic retinopathy with macular edema, unspecified eye. |
| E11349 | 10 | Type 2 diabetes mellitus with severe nonproliferative diabetic retinopathy without macular edema. |
| E113491 | 10 | Type 2 diabetes mellitus with severe nonproliferative diabetic retinopathy without macular edema, right eye. |
| E113492 | 10 | Type 2 diabetes mellitus with severe nonproliferative diabetic retinopathy without macular edema, left eye. |
| E113493 | 10 | Type 2 diabetes mellitus with severe nonproliferative diabetic retinopathy without macular edema, bilateral. |
| E113499 | 10 | Type 2 diabetes mellitus with severe nonproliferative diabetic retinopathy without macular edema, unspecified eye. |
| E1135 | 10 | Type 2 diabetes mellitus with proliferative diabetic retinopathy. |
| E11351 | 10 | Type 2 diabetes mellitus with proliferative diabetic retinopathy with macular edema. |
| E113511 | 10 | Type 2 diabetes mellitus with proliferative diabetic retinopathy with macular edema, right eye. |
| E113512 | 10 | Type 2 diabetes mellitus with proliferative diabetic retinopathy with macular edema, left eye. |
| E113513 | 10 | Type 2 diabetes mellitus with proliferative diabetic retinopathy with macular edema, bilateral. |
| E113519 | 10 | Type 2 diabetes mellitus with proliferative diabetic retinopathy with macular edema, unspecified eye. |
| E11352 | 10 | Type 2 diabetes mellitus with proliferative diabetic retinopathy with traction retinal detachment involving the macula. |
| E113521 | 10 | Type 2 diabetes mellitus with proliferative diabetic retinopathy with traction retinal detachment involving the macula, right eye. |
| E113522 | 10 | Type 2 diabetes mellitus with proliferative diabetic retinopathy with traction retinal detachment involving the macula, left eye. |
| E113523 | 10 | Type 2 diabetes mellitus with proliferative diabetic retinopathy with traction retinal detachment involving the macula, bilateral. |
| E113529 | 10 | Type 2 diabetes mellitus with proliferative diabetic retinopathy with traction retinal detachment involving the macula, unspecified eye. |
| E11353 | 10 | Type 2 diabetes mellitus with proliferative diabetic retinopathy with traction retinal detachment not involving the macula. |
| E113531 | 10 | Type 2 diabetes mellitus with proliferative diabetic retinopathy with traction retinal detachment not involving the macula, right eye. |
| E113532 | 10 | Type 2 diabetes mellitus with proliferative diabetic retinopathy with traction retinal detachment not involving the macula, left eye. |
| E113533 | 10 | Type 2 diabetes mellitus with proliferative diabetic retinopathy with traction retinal detachment not involving the macula, bilateral. |
| E113539 | 10 | Type 2 diabetes mellitus with proliferative diabetic retinopathy with traction retinal detachment not involving the macula, unspecified eye. |
| E11355 | 10 | Type 2 diabetes mellitus with stable proliferative diabetic retinopathy. |
| E113551 | 10 | Type 2 diabetes mellitus with stable proliferative diabetic retinopathy, right eye. |
| E113552 | 10 | Type 2 diabetes mellitus with stable proliferative diabetic retinopathy, left eye. |
| E113553 | 10 | Type 2 diabetes mellitus with stable proliferative diabetic retinopathy, bilateral. |
| E113559 | 10 | Type 2 diabetes mellitus with stable proliferative diabetic retinopathy, unspecified eye. |
| E11359 | 10 | Type 2 diabetes mellitus with proliferative diabetic retinopathy without macular edema. |
| E113591 | 10 | Type 2 diabetes mellitus with proliferative diabetic retinopathy without macular edema, right eye. |
| E113592 | 10 | Type 2 diabetes mellitus with proliferative diabetic retinopathy without macular edema, left eye. |
| E113593 | 10 | Type 2 diabetes mellitus with proliferative diabetic retinopathy without macular edema, bilateral. |
| E113599 | 10 | Type 2 diabetes mellitus with proliferative diabetic retinopathy without macular edema, unspecified eye. |
| E1136 | 10 | Type 2 diabetes mellitus with diabetic cataract. |
| E1137 | 10 | Type 2 diabetes mellitus with diabetic macular edema, resolved following treatment. |
| E1137X1 | 10 | Type 2 diabetes mellitus with diabetic macular edema, resolved following treatment, right eye. |
| E1137X2 | 10 | Type 2 diabetes mellitus with diabetic macular edema, resolved following treatment, left eye. |
| E1137X3 | 10 | Type 2 diabetes mellitus with diabetic macular edema, resolved following treatment, bilateral. |
| E1139 | 10 | Type 2 diabetes mellitus with other diabetic ophthalmic complications. |
| E114 | 10 | Type 2 diabetes mellitus with neurological complications. |
| E1140 | 10 | Type 2 diabetes mellitus with diabetic neuropathy, unspecified. |
| E1141 | 10 | Type 2 diabetes mellitus with diabetic mononeuropathy. |
| E1142 | 10 | Type 2 diabetes mellitus with diabetic polyneuropathy |
| E1143 | 10 | Type 2 diabetes mellitus with diabetic autonomic (poly)neuropathy. |
| E1144 | 10 | Type 2 diabetes mellitus with diabetic amyotrophy. |
| E1149 | 10 | Type 2 diabetes mellitus with other diabetic neurological complications |
| E115 | 10 | Type 2 diabetes mellitus with circulatory complications. |
| E1151 | 10 | Type 2 diabetes mellitus with diabetic peripheral angiopathy without gangrene. |
| E1152 | 10 | Type 2 diabetes mellitus with diabetic peripheral angiopathy with gangrene. |
| E1159 | 10 | Type 2 diabetes mellitus with other circulatory complications. |
| E116 | 10 | Type 2 diabetes mellitus with other specified complications. |
| E1161 | 10 | Type 2 diabetes mellitus with diabetic arthropathy. |
| E11610 | 10 | Type 2 diabetes mellitus with diabetic neuropathic arthropathy. |
| E11618 | 10 | Type 2 diabetes mellitus with other diabetic arthropathy. |
| E1162 | 10 | Type 2 diabetes mellitus with skin complications. |
| E11620 | 10 | Type 2 diabetes mellitus with diabetic dermatitis. |
| E11621 | 10 | Type 2 diabetes mellitus with foot ulcer. |
| E11622 | 10 | Type 2 diabetes mellitus with other skin ulcers. |
| E11628 | 10 | Type 2 diabetes mellitus with other skin complications. |
| E1163 | 10 | Type 2 diabetes mellitus with oral complications. |
| E11630 | 10 | Type 2 diabetes mellitus with periodontal disease. |
| E11638 | 10 | Type 2 diabetes mellitus with other oral complications. |
| E1164 | 10 | Type 2 diabetes mellitus with hypoglycemia. |
| E11641 | 10 | Type 2 diabetes mellitus with hypoglycemia with coma. |
| E11649 | 10 | Type 2 diabetes mellitus with hypoglycemia without coma. |
| E1165 | 10 | Type 2 diabetes mellitus with hyperglycemia. |
| E1169 | 10 | Type 2 diabetes mellitus with other specified complications. |
| E118 | 10 | Type 2 diabetes mellitus with unspecified complications. |
| E119 | 10 | Type 2 diabetes mellitus without complications. |

# Table S2. The ICD code for HF

| ICD code | ICD version | Description |
| --- | --- | --- |
| 39891 | 9 | Rheumatic heart failure (congestive). |
| 40201 | 9 | Malignant hypertensive heart disease with heart failure. |
| 40211 | 9 | Benign hypertensive heart disease with heart failure |
| 40291 | 9 | Unspecified hypertensive heart disease with heart failure. |
| 40401 | 9 | Hypertensive heart and chronic kidney disease, malignant, with heart failure and with chronic kidney disease stage I through stage IV, or unspecified. |
| 40403 | 9 | Hypertensive heart and chronic kidney disease, malignant, with heart failure and with chronic kidney disease stage V or end-stage renal disease. |
| 40411 | 9 | Hypertensive heart and chronic kidney disease, benign, with heart failure and with chronic kidney disease stage I through stage IV, or unspecified |
| 40413 | 9 | Hypertensive heart and chronic kidney disease, benign, with heart failure and chronic kidney disease stage V or end-stage renal disease. |
| 40491 | 9 | Hypertensive heart and chronic kidney disease, unspecified, with heart failure and with chronic kidney disease stage I through stage IV, or unspecified. |
| 40493 | 9 | Hypertensive heart and chronic kidney disease, unspecified, with heart failure and chronic kidney disease stage V or end-stage renal disease. |
| 4280 | 9 | Congestive heart failure, unspecified. |
| 4281 | 9 | Left heart failure. |
| 42820 | 9 | Systolic heart failure, unspecified. |
| 42821 | 9 | Acute systolic heart failure. |
| 42822 | 9 | Chronic systolic heart failure. |
| 42823 | 9 | Acute on chronic systolic heart failure. |
| 42830 | 9 | Diastolic heart failure, unspecified. |
| 42831 | 9 | Acute diastolic heart failure. |
| 42832 | 9 | Chronic diastolic heart failure. |
| 42833 | 9 | Acute chronic diastolic heart failure. |
| 42840 | 9 | Combined systolic and diastolic heart failure, unspecified. |
| 42841 | 9 | Acute combined systolic and diastolic heart failure. |
| 42842 | 9 | Chronic combined systolic and diastolic heart failure. |
| 42843 | 9 | Acute on chronic combined systolic and diastolic heart failure. |
| 4289 | 9 | Heart failure, unspecified. |
| I0981 | 10 | Rheumatic heart failure. |
| I110 | 10 | Hypertensive heart disease with heart failure. |
| I130 | 10 | Hypertensive heart and chronic kidney disease with heart failure and stage 1 through stage 4 chronic kidney disease, or unspecified chronic kidney disease. |
| I132 | 10 | Hypertensive heart and chronic kidney disease with heart failure and with stage 5 chronic kidney disease, or end-stage renal disease. |
| I50 | 10 | Heart failure. |
| I502 | 10 | Systolic (congestive) heart failure. |
| I5020 | 10 | Unspecified systolic (congestive) heart failure. |
| I5021 | 10 | Acute systolic (congestive) heart failure. |
| I5022 | 10 | Chronic systolic (congestive) heart failure. |
| I5023 | 10 | Acute chronic systolic (congestive) heart failure. |
| I503 | 10 | Diastolic (congestive) heart failure. |
| I5030 | 10 | Unspecified diastolic (congestive) heart failure. |
| I5031 | 10 | Acute diastolic (congestive) heart failure. |
| I5032 | 10 | Chronic diastolic (congestive) heart failure. |
| I5033 | 10 | Acute chronic diastolic (congestive) heart failure. |
| I504 | 10 | Combined systolic (congestive) and diastolic (congestive) heart failure. |
| I5040 | 10 | Unspecified combined systolic (congestive) and diastolic (congestive) heart failure. |
| I5041 | 10 | Acute combined systolic (congestive) and diastolic (congestive) heart failure. |
| I5042 | 10 | Chronic combined systolic (congestive) and diastolic (congestive) heart failure. |
| I5043 | 10 | Acute on chronic combined systolic (congestive) and diastolic (congestive) heart failure. |
| I508 | 10 | Other heart failures. |
| I5081 | 10 | Right heart failure. |
| I50810 | 10 | Right heart failure, unspecified. |
| I50811 | 10 | Acute right heart failure. |
| I50812 | 10 | Chronic right heart failure. |
| I50813 | 10 | Acute chronic right heart failure. |
| I50814 | 10 | Right heart failure due to left heart failure. |
| I5082 | 10 | Biventricular heart failure. |
| I5083 | 10 | High-output heart failure. |
| I5084 | 10 | End-stage heart failure. |
| I5089 | 10 | Other heart failures. |
| I509 | 10 | Heart failure, unspecified. |
| I9713 | 10 | Postprocedural heart failure. |
| I97130 | 10 | Postprocedural heart failure following cardiac surgery. |
| I97131 | 10 | Postprocedural heart failure following other surgery. |

# Table S3. Baseline characteristics of MIMIC for T2D and T2D-HF patients

| Characteristic | Overall, N = 11,547 | T2D, N = 8,837 | T2D-HF, N = 2,710 | P value |
| --- | --- | --- | --- | --- |
| ESI, mL/g | 4.17 (3.90, 4.55) | 4.14 (3.89, 4.53) | 4.24 (3.96, 4.61) | <0.001 |
| ePVS, mL/g | 5.64 (4.77, 6.73) | 5.57 (4.73, 6.68) | 5.86 (4.95, 6.91) | <0.001 |
| RDWCV, % | 13.90 (13.20, 14.90) | 13.80 (13.20, 14.80) | 14.10 (13.40, 15.10) | <0.001 |
| Follow-up time, days | 566.00 (110.00, 1,536.00 ) | 517.00 (98.00, 1,464.00 ) | 732.50 (175.00, 1,712.00 ) | <0.001 |
| LOS, days | 3.00 (2.00, 6.00 ) | 4.00 (2.00, 6.00 ) | 3.00 (2.00, 6.00 ) | <0.001 |
| ASCVD, % | 3,572(31) | 2,321(26) | 1,251(46) | <0.001 |
| Hypertension, % | 6,881(60) | 5,335(60) | 1,546(57) | 0.002 |
| Hyperlipidemia, % | 4,810(42) | 3,677(42) | 1,133(42) | 0.9 |
| CKD, % | 4,060(35) | 2,788(32) | 1,272(47) | <0.001 |
| AF, % | 1,324(11) | 827(9.4) | 497(18) | <0.001 |
| Anemia, % | 3,015(26) | 2,199(25) | 816(30) | <0.001 |
| Hyperuricemia, % | 667(5.8) | 441(5.0) | 226(8.3) | <0.001 |
| Sex, (male) % | 6,067(53) | 4,624(52) | 1,443(53) | 0.4 |
| Age, year | 65.00 (55.00, 75.00) | 64.00 (54.00, 73.00) | 70.00 (61.00, 78.00) | <0.001 |
| Hematocrit, % | 34.80 (30.90, 38.50) | 35.00 (31.10, 38.70) | 33.95 (30.40, 37.60) | <0.001 |
| Platelet count, 10^9/L | 224.00 (174.00, 283.00) | 226.00 (176.00, 286.00) | 218.00 (171.00, 274.00) | <0.001 |
| Hemoglobin, g/dL | 11.60 (10.20, 12.90) | 11.60 (10.30, 13.00) | 11.30 (10.10, 12.60) | <0.001 |
| WBC, 10^9/L | 8.40 (6.30, 11.10) | 8.40 (6.30, 11.30) | 8.30 (6.40, 10.70) | 0.036 |
| MCH, pg | 29.80 (28.30, 31.20) | 29.80 (28.20, 31.10) | 29.80 (28.30, 31.20) | 0.6 |
| MCHC, g/dL | 33.30 (32.40, 34.30) | 33.40 (32.40, 34.30) | 33.30 (32.30, 34.30) | 0.058 |
| MCV, fL | 89.00 (85.00, 93.00) | 89.00 (85.00, 93.00) | 89.00 (85.00, 93.00) | 0.047 |
| RBC, 10^12/L | 3.92 (3.47, 4.36) | 3.95 (3.50, 4.38) | 3.83 (3.41, 4.27) | <0.001 |
| Creatinine, mg/dL | 1.00 (0.80, 1.30) | 0.90 (0.70, 1.20) | 1.10 (0.90, 1.60) | <0.001 |
| Chloride, mEq/L | 103.00 (100.00, 106.00) | 103.00 (100.00, 106.00) | 103.00 (100.00, 106.00) | 0.2 |
| Potassium, mEq/L | 4.10 (3.80, 4.50) | 4.10 (3.80, 4.40) | 4.20 (3.80, 4.50) | <0.001 |
| Sodium, mEq/L | 138.88 (136.00, 141.00) | 138.00 (136.00, 141.00) | 139.00 (136.00, 141.00) | <0.001 |
| Anion gap,mEq/L | 14.00 (12.00, 16.00) | 14.00 (12.00, 16.00) | 14.00 (12.00, 16.00) | 0.7 |
| Bicarbonate, mEq/L | 25.00 (23.00, 28.00) | 25.00 (23.00, 27.00) | 26.00 (23.00, 28.00) | <0.001 |
| Magnesium, mg/dL | 1.90 (1.70, 2.10) | 1.90 (1.70, 2.10) | 1.90 (1.70, 2.10) | <0.001 |
| Phosphate, mg/dL | 3.50 (2.90, 4.00) | 3.40 (2.90, 4.00) | 3.50 (3.00, 4.10) | <0.001 |
| Calcium, mg/dL | 8.80 (8.40, 9.20) | 8.80 (8.40, 9.20) | 8.88 (8.40, 9.30) | 0.013 |

#Continuous variables are expressed as interquartile ranges. Categorical variables are expressed as frequency (percentage). ESI, erythrocyte stress index, ePVS, estimated plasma volume statute, RDWCV, red blood cell distribution width coefficient of variation, LOS, length of stay, ASCVD, atherosclerotic cardiovascular disease, CKD, chronic kidney disease, AF, atrial fibrillation, WBC, white blood cell count, MCH, mean corpuscular hemoglobin, MCHC, mean corpuscular hemoglobin concentration, MCV, mean cell volume, RBC, red blood cell count.

# Table S4. Baseline characteristics of TJHFIT for T2D and T2D-HF patients

| Characteristic | Overall, N = 4,266 | T2D, N = 3,265 | T2D-HF, N = 1,001 | P value |
| --- | --- | --- | --- | --- |
| ESI, mL/g | 3.89 (3.67, 4.22) | 3.83 (3.61, 4.13) | 4.12 (3.84, 4.96) | <0.001 |
| LOS, days | 11 (7, 14) | 11 (7, 14) | 12 (8, 14) | 0.006 |
| ePVS, mL/g | 4.68 (4.00, 5.51) | 4.65 (3.98, 5.44) | 4.80 (4.07, 5.75) | <0.001 |
| RDWCV, % | 13.00 (12.58, 13.70) | 13.00 (12.47, 13.53) | 13.40 (12.90, 14.23) | <0.001 |
| Follow-up time, days | 1,348 (969, 1,931) | 1,370 (979, 1,944) | 1,289 (951, 1,890) | 0.064 |
| Sex, (male) % | 2,265(53) | 1,751(54) | 514(51) | 0.2 |
| Age, year | 65 (58, 72) | 65 (58, 72) | 67 (59, 74) | <0.001 |
| AF, % | 242(5.7) | 155(4.7) | 87(8.7) | <0.001 |
| Hypertension, % | 3,108(73) | 2,342(72) | 766(77) | 0.003 |
| Hyperlipidemia, % | 851(20) | 670(21) | 181(18) | 0.091 |
| CKD, % | 1,385(32) | 1,017(31) | 368(37) | <0.001 |
| COPD, % | 145(3.4) | 102(3.1) | 43(4.3) | 0.073 |
| ASCVD, % | 2,145(50) | 1,601(49) | 544(54) | 0.003 |
| Anemia, % | 402(9.4) | 257(7.9) | 145(14) | <0.001 |
| Hyperuricemia, % | 228(5.3) | 175(5.4) | 53(5.3) | >0.9 |
| MCH, pg | 30.20 (29.00, 31.30) | 30.30 (29.12, 31.40) | 29.80 (28.64, 31.00) | <0.001 |
| NEU, 10^9/L | 4.58 (3.49, 6.26) | 4.53 (3.43, 6.17) | 4.70 (3.63, 6.52) | 0.002 |
| MONO, % | 6.10 (4.30, 7.80) | 6.00 (4.10, 7.77) | 6.30 (4.90, 7.99) | <0.001 |
| LYM, 10^9/L | 1.60 (1.18, 2.09) | 1.62 (1.19, 2.10) | 1.56 (1.15, 2.08) | 0.3 |
| MCV, fL | 90.10 (86.50, 94.00) | 89.89 (86.50, 93.60) | 90.90 (86.70, 96.70) | <0.001 |
| Hematocrit, % | 39.09 (35.21, 42.91) | 39.09 (35.38, 42.80) | 39.07 (34.69, 43.29) | >0.9 |
| Hemoglobin, g/L | 130.05 (117.10, 142.89) | 130.96 (118.41, 143.88) | 126.12 (112.06, 139.36) | <0.001 |
| MCHC, g/dL | 335.22 (324.17, 344.92) | 336.84 (326.28, 346.32) | 329.61 (314.02, 338.37) | <0.001 |
| WBC, 10^9/L | 7.08 (5.74, 8.90) | 7.00 (5.68, 8.80) | 7.24 (5.91, 9.13) | <0.001 |
| BASO, % | 0.30 (0.10, 0.50) | 0.30 (0.10, 0.50) | 0.30 (0.14, 0.56) | 0.006 |
| EOS, % | 1.10 (0.20, 2.20) | 1.10 (0.14, 2.20) | 1.15 (0.30, 2.23) | 0.069 |
| BA, 10^9/L | 0.02 (0.01, 0.04) | 0.02 (0.01, 0.04) | 0.02 (0.01, 0.04) | 0.051 |
| EO, 10^9/L | 0.09 (0.04, 0.17) | 0.09 (0.04, 0.17) | 0.09 (0.04, 0.17) | >0.9 |
| Platelet count, 10^9/L | 215.00 (174.00, 264.00) | 215.00 (175.00, 262.20) | 210.30 (168.90, 267.00) | 0.3 |
| RBC, 10^12/L | 4.33 (3.93, 4.71) | 4.34 (3.96, 4.73) | 4.26 (3.81, 4.65) | <0.001 |
| TBIL, μmol/L | 10.30 (7.20, 14.50) | 10.30 (7.20, 14.60) | 10.30 (7.40, 14.40) | 0.8 |
| ALT, U/L | 16.00 (11.00, 25.00) | 16.00 (11.00, 25.00) | 16.00 (11.00, 25.00) | 0.4 |
| ALB, g/L | 39.40 (35.90, 42.50) | 39.70 (36.20, 42.70) | 38.40 (34.80, 41.80) | <0.001 |
| Glucose, mmol/L | 8.41 (6.40, 11.88) | 8.40 (6.40, 11.77) | 8.46 (6.40, 12.20) | 0.8 |
| Creatinine, μmoI/L | 68.00 (55.00, 88.00) | 67.00 (55.00, 85.00) | 72.10 (56.40, 99.00) | <0.001 |
| Uric acid, μmoI/L | 298.00 (239.00, 370.20) | 294.00 (238.00, 365.00) | 312.00 (244.00, 387.00) | <0.001 |
| Chloride, mmol/L | 102.50 (99.65, 105.00) | 102.50 (99.60, 105.00) | 102.50 (99.70, 105.00) | 0.8 |
| Potassium, mmol/L | 4.10 (3.80, 4.40) | 4.10 (3.80, 4.40) | 4.10 (3.80, 4.40) | 0.3 |
| Sodium, mmol/L | 140.00 (137.20, 142.00) | 140.00 (137.20, 142.00) | 140.00 (137.10, 141.90) | 0.4 |
| INR | 0.97 (0.91, 1.03) | 0.96 (0.90, 1.03) | 0.97 (0.92, 1.04) | 0.002 |
| TT, sec | 12.30 (10.80, 16.50) | 12.30 (10.80, 16.60) | 12.50 (10.90, 16.40) | 0.6 |
| APTT, sec | 28.20 (24.80, 31.40) | 27.90 (24.70, 31.10) | 28.80 (25.50, 32.00) | <0.001 |

#Continuous variables are expressed as interquartile ranges. Categorical variables are expressed as frequency (percentage). ESI, erythrocyte stress index, LOS, length of stay, ePVS, estimated plasma volume statute, RDWCV, red blood cell distribution width coefficient of variation, AF, atrial fibrillation, CKD, chronic kidney disease, COPD, chronic obstructive pulmonary disease, ASCVD, atherosclerotic cardiovascular disease, MCH, mean corpuscular hemoglobin, NEU, Neutrophil count, MONO, monocytes ratio, LYM, Lymphocyte count, MCV, mean cell volume, MCHC, mean corpuscular hemoglobin concentration, WBC, white blood cell count, BASO, basophils ratio, EOS, eosinophils ratio, BA, Basophils count, EO, eosinophils count, RBC, red blood cell count, TBIIL, total bilirubin, ALT, alanine aminotransferase, ALB, albumin, INR, International normalized ratio, TT, thrombin time, APTT, activated partial thromboplastin time.

# Table S5. Baseline characteristics for ESIQ in TJHFIT

| Characteristic | Q1, N = 1,097 | Q2, N = 1,041 | Q3, N = 1,068 | Q4, N = 1,060 | *P* value |
| --- | --- | --- | --- | --- | --- |
| T2D-HF, % | 165(15) | 219(21) | 288(27) | 329(31) | <0.001 |
| ESI, mL/g | 3.54 (3.44, 3.61) | 3.78 (3.73, 3.84) | 4.03 (3.96, 4.12) | 4.71 (4.40, 5.39) | <0.001 |
| LOS, days | 11.00 (8.00, 14.00) | 11.00 (7.00, 14.00) | 11.00 (7.00, 14.00) | 11.00 (8.00, 15.00) | <0.001 |
| ePVS, mL/g | 4.49 (3.91, 5.18) | 4.54 (3.97, 5.29) | 4.80 (4.17, 5.56) | 4.90 (3.96, 6.12) | <0.001 |
| RDWCV, % | 12.30 (12.00, 12.60) | 12.80 (12.60, 13.00) | 13.34 (13.00, 13.70) | 14.50 (13.67, 16.00) | <0.001 |
| Follow-up time, days | 1,390 (1,049, 1,939) | 1,381 (1,008, 1,959) | 1,294 (933, 1,868.50) | 1,297.50 (909.50, 1,945) | <0.001 |
| Sex, (male) % | 691(63) | 582(56) | 495(46) | 497(47) | <0.001 |
| Age, year | 63 (55, 70) | 65 (58, 72) | 67 (60, 73) | 67 (60, 74) | <0.001 |
| AF, % | 50(4.6) | 50(4.8) | 56(5.2) | 86(8.1) | 0.001 |
| Hypertension, % | 778(71) | 779(75) | 797(75) | 754(71) | 0.060 |
| Hyperlipidemia, % | 267(24) | 219(21) | 194(18) | 171(16) | <0.001 |
| CKD, % | 345(31) | 333(32) | 349(33) | 358(34) | 0.7 |
| COPD, % | 26(2.4) | 23(2.2) | 47(4.4) | 49(4.6) | 0.001 |
| ASCVD, % | 547(50) | 531(51) | 548(51) | 519(49) | 0.7 |
| Anemia, % | 51(4.6) | 60(5.8) | 117(11) | 174(16) | <0.001 |
| Hyperuricemia, % | 59(5.4) | 55(5.3) | 57(5.3) | 57(5.4) | >0.9 |
| MCH, pg | 31.00 (30.00, 32.00) | 30.40 (29.40, 31.30) | 29.76 (28.80, 30.90) | 29.20 (27.80, 30.70) | <0.001 |
| NEU, 10^9/L | 4.50 (3.45, 6.10) | 4.49 (3.48, 6.03) | 4.69 (3.58, 6.39) | 4.70 (3.46, 6.49) | 0.024 |
| MONO, % | 5.80 (3.80, 7.44) | 6.00 (4.10, 7.43) | 6.00 (4.30, 7.80) | 6.79 (5.08, 8.35) | <0.001 |
| LYM, 10^9/L | 1.67 (1.26, 2.14) | 1.61 (1.23, 2.06) | 1.61 (1.14, 2.10) | 1.53 (1.09, 2.07) | <0.001 |
| MCV, fL | 88.70 (85.30, 91.90) | 89.80 (86.90, 92.70) | 90.16 (86.90, 93.30) | 93.90 (87.30, 106.85) | <0.001 |
| Hematocrit, % | 38.79 (35.39, 42.29) | 39.50 (35.89, 42.68) | 38.62 (35.15, 42.01) | 39.52 (34.09, 46.22) | <0.001 |
| Hemoglobin, g/L | 136.08 (124.81, 148.05) | 133.18 (121.04, 144.86) | 127.37 (116.66, 139.07) | 121.93 (106.71, 136.17) | <0.001 |
| MCHC, g/dL | 348.20 (340.86, 357.74) | 338.57 (332.97, 344.74) | 330.67 (324.50, 337.64) | 312.76 (281.06, 325.80) | <0.001 |
| WBC, 10^9/L | 6.99 (5.69, 8.67) | 6.89 (5.63, 8.64) | 7.11 (5.82, 9.01) | 7.24 (5.80, 9.20) | 0.036 |
| BASO, % | 0.30 (0.04, 0.50) | 0.30 (0.10, 0.50) | 0.30 (0.10, 0.50) | 0.38 (0.20, 0.60) | <0.001 |
| EOS, % | 1.00 (0.18, 2.00) | 1.20 (0.20, 2.20) | 1.16 (0.20, 2.30) | 1.08 (0.20, 2.21) | 0.2 |
| BA, 10^9/L | 0.02 (0.01, 0.03) | 0.02 (0.01, 0.03) | 0.02 (0.01, 0.04) | 0.03 (0.01, 0.05) | <0.001 |
| EO, 10^9/L | 0.09 (0.04, 0.17) | 0.10 (0.04, 0.17) | 0.10 (0.04, 0.18) | 0.08 (0.03, 0.16) | 0.004 |
| Platelet count, 10^9/L | 215.00 (178.00, 263.00) | 218.00 (179.00, 263.00) | 218.00 (174.15, 265.00) | 206.55 (166.85, 262.35) | 0.014 |
| RBC, 10^12/L | 4.39 (4.01, 4.78) | 4.38 (3.98, 4.75) | 4.27 (3.92, 4.69) | 4.23 (3.74, 4.65) | <0.001 |
| TBIL, μmol/L | 10.90 (8.00, 15.20) | 10.20 (7.10, 13.90) | 9.80 (7.10, 13.75) | 10.30 (6.90, 15.25) | <0.001 |
| ALT, U/L | 17.00 (12.00, 26.00) | 16.00 (11.00, 25.00) | 16.00 (11.00, 24.00) | 16.00 (10.75, 25.00) | 0.002 |
| ALB, g/L | 40.00 (37.10, 43.20) | 40.20 (36.80, 43.20) | 38.90 (35.80, 42.40) | 38.00 (34.60, 41.00) | <0.001 |
| Glucose, mmol/L | 9.43 (7.04, 13.41) | 8.46 (6.50, 11.62) | 7.85 (6.19, 11.16) | 7.94 (6.15, 11.14) | <0.001 |
| Creatinine, μmoI/L | 66.90 (55.00, 85.00) | 68.10 (55.00, 87.40) | 67.25 (55.00, 87.85) | 70.00 (56.00, 93.00) | 0.068 |
| Uric acid, μmoI/L | 294.00 (235.40, 361.00) | 300.00 (241.00, 376.00) | 300.00 (241.00, 368.00) | 300.00 (239.00, 384.75) | 0.2 |
| Chloride, mmol/L | 101.80 (98.90, 104.40) | 102.60 (100.00, 105.00) | 102.99 (100.00, 105.30) | 102.70 (99.80, 105.40) | <0.001 |
| Potassium, mmol/L | 4.05 (3.77, 4.40) | 4.10 (3.80, 4.40) | 4.10 (3.80, 4.40) | 4.11 (3.79, 4.41) | 0.2 |
| Sodium, mmol/L | 139.32 (136.60, 141.80) | 140.00 (137.30, 142.00) | 140.20 (138.00, 142.10) | 140.00 (137.40, 142.00) | <0.001 |
| INR | 0.95 (0.89, 1.01) | 0.95 (0.89, 1.01) | 0.96 (0.91, 1.03) | 1.00 (0.94, 1.06) | <0.001 |
| TT, sec | 12.10 (10.70, 16.70) | 12.00 (10.70, 16.70) | 12.45 (10.80, 17.10) | 13.00 (11.10, 15.70) | 0.017 |
| APTT, sec | 27.10 (24.10, 30.80) | 27.10 (24.20, 30.40) | 27.80 (24.70, 31.10) | 29.80 (27.05, 32.80) | <0.001 |

#Continuous variables are expressed as interquartile ranges. Categorical variables are expressed as frequency (percentage). T2D-HF, type 2 diabetes - heart failure, ESI, erythrocyte stress index, LOS, length of stay, ePVS, estimated plasma volume statute, RDWCV, red blood cell distribution width coefficient of variation, AF, atrial fibrillation, CKD, chronic kidney disease, COPD, chronic obstructive pulmonary disease, ASCVD, atherosclerotic cardiovascular disease, MCH, mean corpuscular hemoglobin, NEU, Neutrophil count, MONO, monocytes ratio, LYM, Lymphocyte count, MCV, mean cell volume, MCHC, mean corpuscular hemoglobin concentration, WBC, white blood cell count, BASO, basophils ratio, EOS, eosinophils ratio, BA, Basophils count, EO, eosinophils count, RBC, red blood cell count, TBIIL, total bilirubin, ALT, alanine aminotransferase, ALB, albumin, INR, International normalized ratio, TT, thrombin time, APTT, activated partial thromboplastin time.

# Table S6. The subgroup Cox regression of the T2D-derived HF patients in TJHFIT

| Subgroup | Characteristic | Model 1 |  | Model 2 |  | Model 3 |  | Model 4 |  |
| --- | --- | --- | --- | --- | --- | --- | --- | --- | --- |
|  |  | HR (95% CI) | *P* value | HR (95% CI) | *P* value | HR (95% CI) | *P* value | HR (95% CI) | *P* value |
| Age > 60 years | ESI | 1.25 (1.20, 1.30) | <0.001 | 1.25 (1.20, 1.30) | <0.001 | 1.24 (1.19, 1.30) | <0.001 | 1.22 (1.17, 1.28) | <0.001 |
| Age > 60 years | ESIQ |  |  |  |  |  |  |  |  |
| Age > 60 years | Q1 | ref | ref | ref | ref | ref | ref | ref | ref |
| Age > 60 years | Q2 | 1.49 (1.16, 1.93) | 0.002 | 1.45 (1.12, 1.87) | 0.004 | 1.43 (1.11, 1.85) | 0.006 | 1.40 (1.09, 1.81) | 0.010 |
| Age > 60 years | Q3 | 2.23 (1.76, 2.83) | <0.001 | 2.16 (1.70, 2.75) | <0.001 | 2.12 (1.67, 2.69) | <0.001 | 2.04 (1.60, 2.59) | <0.001 |
| Age > 60 years | Q4 | 2.24 (1.77, 2.84) | <0.001 | 2.15 (1.70, 2.73) | <0.001 | 2.03 (1.60, 2.58) | <0.001 | 1.86 (1.46, 2.38) | <0.001 |
| Age > 60 years | RDWCV | 1.09 (1.07, 1.11) | <0.001 | 1.09 (1.07, 1.11) | <0.001 | 1.08 (1.06, 1.10) | <0.001 | 1.08 (1.06, 1.10) | <0.001 |
| Age > 60 years | MCHC | 0.99 (0.98, 0.99) | <0.001 | 0.99 (0.98, 0.99) | <0.001 | 0.99 (0.99, 0.99) | <0.001 | 0.99 (0.99, 0.99) | <0.001 |
| Age > 60 years | ePVS | 1.11 (1.07, 1.15) | <0.001 | 1.11 (1.07, 1.15) | <0.001 | 1.08 (1.03, 1.12) | 0.001 | 1.03 (0.99, 1.09) | 0.2 |
| Age ≤ 60 years | ESI | 1.25 (1.17, 1.33) | <0.001 | 1.25 (1.17, 1.33) | <0.001 | 1.22 (1.14, 1.31) | <0.001 | 1.21 (1.13, 1.30) | <0.001 |
| Age ≤ 60 years | ESIQ |  |  |  |  |  |  |  |  |
| Age ≤ 60 years | Q1 | ref | ref | ref | ref | ref | ref | ref | ref |
| Age ≤ 60 years | Q2 | 1.34 (0.96, 1.88) | 0.086 | 1.35 (0.96, 1.89) | 0.082 | 1.35 (0.96, 1.89) | 0.083 | 1.37 (0.98, 1.92) | 0.069 |
| Age ≤ 60 years | Q3 | 1.48 (1.05, 2.10) | 0.026 | 1.49 (1.05, 2.12) | 0.025 | 1.43 (1.00, 2.03) | 0.048 | 1.36 (0.95, 1.93) | 0.093 |
| Age ≤ 60 years | Q4 | 2.10 (1.53, 2.89) | <0.001 | 2.11 (1.53, 2.91) | <0.001 | 1.85 (1.33, 2.57) | <0.001 | 1.77 (1.27, 2.47) | <0.001 |
| Age ≤ 60 years | RDWCV | 1.08 (1.05, 1.11) | <0.001 | 1.08 (1.05, 1.11) | <0.001 | 1.08 (1.05, 1.11) | <0.001 | 1.07 (1.04, 1.11) | <0.001 |
| Age ≤ 60 years | MCHC | 0.99 (0.98, 0.99) | <0.001 | 0.99 (0.98, 0.99) | <0.001 | 0.99 (0.98, 0.99) | <0.001 | 0.99 (0.98, 0.99) | <0.001 |
| Age ≤ 60 years | ePVS | 1.15 (1.10, 1.21) | <0.001 | 1.16 (1.10, 1.23) | <0.001 | 1.13 (1.05, 1.21) | 0.001 | 1.10 (1.02, 1.18) | 0.018 |
| sex_Male | ESI | 1.31 (1.24, 1.37) | <0.001 | 1.31 (1.24, 1.38) | <0.001 | 1.30 (1.23, 1.36) | <0.001 | 1.26 (1.20, 1.33) | <0.001 |
| sex_Male | ESIQ |  |  |  |  |  |  |  |  |
| sex_Male | Q1 | ref | ref | ref | ref | ref | ref | ref | ref |
| sex_Male | Q2 | 1.34 (1.03, 1.74) | 0.031 | 1.30 (1.00, 1.69) | 0.053 | 1.30 (0.99, 1.69) | 0.056 | 1.28 (0.98, 1.67) | 0.066 |
| sex_Male | Q3 | 2.15 (1.66, 2.77) | <0.001 | 2.04 (1.58, 2.64) | <0.001 | 1.95 (1.51, 2.53) | <0.001 | 1.86 (1.43, 2.41) | <0.001 |
| sex_Male | Q4 | 2.23 (1.74, 2.86) | <0.001 | 2.14 (1.67, 2.75) | <0.001 | 2.01 (1.56, 2.59) | <0.001 | 1.84 (1.42, 2.39) | <0.001 |
| sex_Male | RDWCV | 1.10 (1.08, 1.12) | <0.001 | 1.10 (1.08, 1.12) | <0.001 | 1.10 (1.07, 1.12) | <0.001 | 1.09 (1.06, 1.11) | <0.001 |
| sex_Male | MCHC | 0.99 (0.98, 0.99) | <0.001 | 0.99 (0.98, 0.99) | <0.001 | 0.99 (0.98, 0.99) | <0.001 | 0.99 (0.99, 0.99) | <0.001 |
| sex_Male | ePVS | 1.19 (1.13, 1.25) | <0.001 | 1.18 (1.12, 1.24) | <0.001 | 1.13 (1.06, 1.21) | <0.001 | 1.07 (0.99, 1.15) | 0.070 |
| sex_Female | ESI | 1.21 (1.16, 1.27) | <0.001 | 1.21 (1.15, 1.26) | <0.001 | 1.19 (1.13, 1.24) | <0.001 | 1.18 (1.12, 1.24) | <0.001 |
| sex_Female | ESIQ |  |  |  |  |  |  |  |  |
| sex_Female | Q1 | ref | ref | ref | ref | ref | ref | ref | ref |
| sex_Female | Q2 | 1.60 (1.17, 2.20) | 0.004 | 1.56 (1.14, 2.14) | 0.006 | 1.53 (1.11, 2.10) | 0.009 | 1.57 (1.14, 2.17) | 0.006 |
| sex_Female | Q3 | 1.95 (1.45, 2.62) | <0.001 | 1.87 (1.39, 2.52) | <0.001 | 1.82 (1.36, 2.46) | <0.001 | 1.80 (1.33, 2.44) | <0.001 |
| sex_Female | Q4 | 2.24 (1.68, 3.00) | <0.001 | 2.12 (1.58, 2.84) | <0.001 | 1.90 (1.42, 2.56) | <0.001 | 1.82 (1.34, 2.46) | <0.001 |
| sex_Female | RDWCV | 1.07 (1.05, 1.10) | <0.001 | 1.07 (1.05, 1.10) | <0.001 | 1.07 (1.04, 1.09) | <0.001 | 1.06 (1.04, 1.09) | <0.001 |
| sex_Female | MCHC | 0.99 (0.98, 0.99) | <0.001 | 0.99 (0.98, 0.99) | <0.001 | 0.99 (0.99, 0.99) | <0.001 | 0.99 (0.99, 0.99) | <0.001 |
| sex_Female | ePVS | 1.10 (1.06, 1.14) | <0.001 | 1.11 (1.07, 1.15) | <0.001 | 1.07 (1.02, 1.12) | 0.003 | 1.05 (1.00, 1.10) | 0.054 |
| AF_TRUE | ESI | 1.26 (1.15, 1.39) | <0.001 | 1.27 (1.15, 1.40) | <0.001 | 1.26 (1.14, 1.40) | <0.001 | 1.28 (1.14, 1.43) | <0.001 |
| AF_TRUE | ESIQ |  |  |  |  |  |  |  |  |
| AF_TRUE | Q1 | ref | ref | ref | ref | ref | ref | ref | ref |
| AF_TRUE | Q2 | 1.40 (0.63, 3.12) | 0.4 | 1.41 (0.63, 3.13) | 0.4 | 1.30 (0.58, 2.92) | 0.5 | 1.14 (0.49, 2.63) | 0.8 |
| AF_TRUE | Q3 | 3.26 (1.55, 6.87) | 0.002 | 3.30 (1.56, 6.98) | 0.002 | 3.55 (1.67, 7.54) | 0.001 | 3.67 (1.73, 7.81) | <0.001 |
| AF_TRUE | Q4 | 2.82 (1.40, 5.66) | 0.004 | 2.88 (1.42, 5.85) | 0.003 | 2.85 (1.37, 5.95) | 0.005 | 2.42 (1.16, 5.08) | 0.019 |
| AF_TRUE | RDWCV | 1.07 (1.03, 1.12) | <0.001 | 1.07 (1.03, 1.12) | <0.001 | 1.08 (1.03, 1.12) | 0.001 | 1.08 (1.03, 1.13) | 0.001 |
| AF_TRUE | MCHC | 0.98 (0.98, 0.99) | <0.001 | 0.98 (0.98, 0.99) | <0.001 | 0.98 (0.98, 0.99) | <0.001 | 0.98 (0.98, 0.99) | <0.001 |
| AF_TRUE | ePVS | 1.13 (0.96, 1.34) | 0.14 | 1.13 (0.95, 1.34) | 0.2 | 1.09 (0.87, 1.37) | 0.5 | 1.03 (0.81, 1.32) | 0.8 |
| AF_FALSE | ESI | 1.24 (1.20, 1.29) | <0.001 | 1.24 (1.19, 1.29) | <0.001 | 1.23 (1.18, 1.28) | <0.001 | 1.21 (1.16, 1.26) | <0.001 |
| AF_FALSE | ESIQ |  |  |  |  |  |  |  |  |
| AF_FALSE | Q1 | ref | ref | ref | ref | ref | ref | ref | ref |
| AF_FALSE | Q2 | 1.45 (1.17, 1.78) | <0.001 | 1.40 (1.14, 1.73) | 0.002 | 1.39 (1.13, 1.71) | 0.002 | 1.38 (1.12, 1.71) | 0.002 |
| AF_FALSE | Q3 | 1.97 (1.62, 2.41) | <0.001 | 1.89 (1.55, 2.31) | <0.001 | 1.80 (1.47, 2.21) | <0.001 | 1.73 (1.41, 2.11) | <0.001 |
| AF_FALSE | Q4 | 2.14 (1.76, 2.60) | <0.001 | 2.05 (1.68, 2.49) | <0.001 | 1.88 (1.54, 2.30) | <0.001 | 1.75 (1.43, 2.14) | <0.001 |
| AF_FALSE | RDWCV | 1.08 (1.07, 1.10) | <0.001 | 1.08 (1.07, 1.10) | <0.001 | 1.08 (1.06, 1.10) | <0.001 | 1.07 (1.06, 1.09) | <0.001 |
| AF_FALSE | MCHC | 0.99 (0.99, 0.99) | <0.001 | 0.99 (0.99, 0.99) | <0.001 | 0.99 (0.99, 0.99) | <0.001 | 0.99 (0.99, 0.99) | <0.001 |
| AF_FALSE | ePVS | 1.13 (1.10, 1.16) | <0.001 | 1.13 (1.10, 1.16) | <0.001 | 1.09 (1.05, 1.13) | <0.001 | 1.05 (1.01, 1.09) | 0.015 |
| ASCVD_TRUE | ESI | 1.26 (1.20, 1.32) | <0.001 | 1.25 (1.19, 1.31) | <0.001 | 1.24 (1.18, 1.30) | <0.001 | 1.21 (1.14, 1.27) | <0.001 |
| ASCVD_TRUE | ESIQ |  |  |  |  |  |  |  |  |
| ASCVD_TRUE | Q1 | ref | ref | ref | ref | ref | ref | ref | ref |
| ASCVD_TRUE | Q2 | 1.46 (1.11, 1.92) | 0.006 | 1.44 (1.09, 1.89) | 0.010 | 1.42 (1.08, 1.87) | 0.012 | 1.40 (1.07, 1.84) | 0.016 |
| ASCVD_TRUE | Q3 | 1.88 (1.45, 2.43) | <0.001 | 1.83 (1.41, 2.38) | <0.001 | 1.83 (1.41, 2.38) | <0.001 | 1.75 (1.34, 2.27) | <0.001 |
| ASCVD_TRUE | Q4 | 2.40 (1.86, 3.11) | <0.001 | 2.35 (1.81, 3.04) | <0.001 | 2.17 (1.66, 2.82) | <0.001 | 1.96 (1.50, 2.56) | <0.001 |
| ASCVD_TRUE | RDWCV | 1.09 (1.06, 1.11) | <0.001 | 1.09 (1.06, 1.11) | <0.001 | 1.08 (1.05, 1.10) | <0.001 | 1.07 (1.04, 1.09) | <0.001 |
| ASCVD_TRUE | MCHC | 0.99 (0.98, 0.99) | <0.001 | 0.99 (0.98, 0.99) | <0.001 | 0.99 (0.98, 0.99) | <0.001 | 0.99 (0.98, 0.99) | <0.001 |
| ASCVD_TRUE | ePVS | 1.20 (1.14, 1.27) | <0.001 | 1.19 (1.12, 1.26) | <0.001 | 1.15 (1.07, 1.24) | <0.001 | 1.11 (1.03, 1.19) | 0.008 |
| ASCVD_FALSE | ESI | 1.26 (1.20, 1.32) | <0.001 | 1.26 (1.20, 1.32) | <0.001 | 1.23 (1.17, 1.30) | <0.001 | 1.23 (1.17, 1.29) | <0.001 |
| ASCVD_FALSE | ESIQ |  |  |  |  |  |  |  |  |
| ASCVD_FALSE | Q1 | ref | ref | ref | ref | ref | ref | ref | ref |
| ASCVD_FALSE | Q2 | 1.41 (1.05, 1.91) | 0.025 | 1.38 (1.02, 1.87) | 0.035 | 1.36 (1.01, 1.85) | 0.044 | 1.34 (0.99, 1.82) | 0.058 |
| ASCVD_FALSE | Q3 | 2.18 (1.64, 2.90) | <0.001 | 2.11 (1.58, 2.82) | <0.001 | 2.00 (1.50, 2.67) | <0.001 | 1.90 (1.42, 2.54) | <0.001 |
| ASCVD_FALSE | Q4 | 2.12 (1.61, 2.78) | <0.001 | 2.03 (1.54, 2.68) | <0.001 | 1.79 (1.35, 2.38) | <0.001 | 1.70 (1.27, 2.26) | <0.001 |
| ASCVD_FALSE | RDWCV | 1.09 (1.07, 1.11) | <0.001 | 1.09 (1.07, 1.11) | <0.001 | 1.08 (1.06, 1.11) | <0.001 | 1.08 (1.06, 1.10) | <0.001 |
| ASCVD_FALSE | MCHC | 0.99 (0.98, 0.99) | <0.001 | 0.99 (0.98, 0.99) | <0.001 | 0.99 (0.99, 0.99) | <0.001 | 0.99 (0.99, 0.99) | <0.001 |
| ASCVD_FALSE | ePVS | 1.11 (1.07, 1.15) | <0.001 | 1.11 (1.07, 1.15) | <0.001 | 1.06 (1.01, 1.11) | 0.016 | 1.03 (0.98, 1.08) | 0.3 |
| CKD_FALSE | ESI | 1.27 (1.21, 1.32) | <0.001 | 1.26 (1.21, 1.32) | <0.001 | 1.26 (1.20, 1.31) | <0.001 | 1.24 (1.19, 1.30) | <0.001 |
| CKD_FALSE | ESIQ |  |  |  |  |  |  |  |  |
| CKD_FALSE | Q1 | ref | ref | ref | ref | ref | ref | ref | ref |
| CKD_FALSE | Q2 | 1.54 (1.19, 1.99) | 0.001 | 1.49 (1.15, 1.94) | 0.002 | 1.50 (1.16, 1.95) | 0.002 | 1.48 (1.14, 1.93) | 0.003 |
| CKD_FALSE | Q3 | 2.35 (1.84, 3.00) | <0.001 | 2.22 (1.73, 2.85) | <0.001 | 2.17 (1.70, 2.79) | <0.001 | 2.08 (1.62, 2.68) | <0.001 |
| CKD_FALSE | Q4 | 2.43 (1.91, 3.09) | <0.001 | 2.31 (1.81, 2.94) | <0.001 | 2.25 (1.76, 2.88) | <0.001 | 2.07 (1.61, 2.67) | <0.001 |
| CKD_FALSE | RDWCV | 1.09 (1.07, 1.11) | <0.001 | 1.09 (1.07, 1.11) | <0.001 | 1.08 (1.06, 1.10) | <0.001 | 1.08 (1.06, 1.10) | <0.001 |
| CKD_FALSE | MCHC | 0.99 (0.98, 0.99) | <0.001 | 0.99 (0.98, 0.99) | <0.001 | 0.99 (0.98, 0.99) | <0.001 | 0.99 (0.99, 0.99) | <0.001 |
| CKD_FALSE | ePVS | 1.08 (1.03, 1.13) | 0.001 | 1.08 (1.03, 1.14) | 0.003 | 1.05 (0.98, 1.11) | 0.15 | 1.01 (0.95, 1.08) | 0.7 |
| CKD_TRUE | ESI | 1.24 (1.17, 1.32) | <0.001 | 1.24 (1.17, 1.31) | <0.001 | 1.22 (1.14, 1.29) | <0.001 | 1.20 (1.12, 1.27) | <0.001 |
| CKD_TRUE | ESIQ |  |  |  |  |  |  |  |  |
| CKD_TRUE | Q1 | ref | ref | ref | ref | ref | ref | ref | ref |
| CKD_TRUE | Q2 | 1.31 (0.95, 1.81) | 0.10 | 1.27 (0.92, 1.76) | 0.2 | 1.17 (0.85, 1.63) | 0.3 | 1.17 (0.84, 1.62) | 0.3 |
| CKD_TRUE | Q3 | 1.56 (1.15, 2.13) | 0.005 | 1.51 (1.10, 2.06) | 0.010 | 1.44 (1.06, 1.97) | 0.021 | 1.38 (1.00, 1.88) | 0.047 |
| CKD_TRUE | Q4 | 1.93 (1.43, 2.60) | <0.001 | 1.84 (1.36, 2.49) | <0.001 | 1.55 (1.14, 2.12) | 0.006 | 1.46 (1.07, 2.01) | 0.017 |
| CKD_TRUE | RDWCV | 1.09 (1.06, 1.12) | <0.001 | 1.09 (1.06, 1.12) | <0.001 | 1.08 (1.05, 1.11) | <0.001 | 1.07 (1.04, 1.10) | <0.001 |
| CKD_TRUE | MCHC | 0.99 (0.98, 0.99) | <0.001 | 0.99 (0.98, 0.99) | <0.001 | 0.99 (0.99, 0.99) | <0.001 | 0.99 (0.99, 0.99) | <0.001 |
| CKD_TRUE | ePVS | 1.14 (1.10, 1.17) | <0.001 | 1.14 (1.10, 1.17) | <0.001 | 1.11 (1.06, 1.16) | <0.001 | 1.07 (1.02, 1.12) | 0.003 |
| Hypertension_TRUE | ESI | 1.28 (1.23, 1.33) | <0.001 | 1.28 (1.23, 1.33) | <0.001 | 1.27 (1.22, 1.33) | <0.001 | 1.25 (1.19, 1.30) | <0.001 |
| Hypertension_TRUE | ESIQ |  |  |  |  |  |  |  |  |
| Hypertension_TRUE | Q1 | ref | ref | ref | ref | ref | ref | ref | ref |
| Hypertension_TRUE | Q2 | 1.48 (1.17, 1.87) | <0.001 | 1.44 (1.14, 1.82) | 0.002 | 1.44 (1.14, 1.81) | 0.002 | 1.43 (1.13, 1.80) | 0.003 |
| Hypertension_TRUE | Q3 | 2.07 (1.66, 2.58) | <0.001 | 2.00 (1.60, 2.49) | <0.001 | 1.93 (1.54, 2.41) | <0.001 | 1.87 (1.49, 2.34) | <0.001 |
| Hypertension_TRUE | Q4 | 2.26 (1.81, 2.80) | <0.001 | 2.14 (1.72, 2.67) | <0.001 | 2.02 (1.61, 2.53) | <0.001 | 1.88 (1.50, 2.36) | <0.001 |
| Hypertension_TRUE | RDWCV | 1.09 (1.07, 1.11) | <0.001 | 1.09 (1.07, 1.11) | <0.001 | 1.08 (1.06, 1.10) | <0.001 | 1.07 (1.06, 1.09) | <0.001 |
| Hypertension_TRUE | MCHC | 0.99 (0.98, 0.99) | <0.001 | 0.99 (0.98, 0.99) | <0.001 | 0.99 (0.98, 0.99) | <0.001 | 0.99 (0.98, 0.99) | <0.001 |
| Hypertension_TRUE | ePVS | 1.13 (1.10, 1.17) | <0.001 | 1.14 (1.11, 1.17) | <0.001 | 1.10 (1.06, 1.14) | <0.001 | 1.06 (1.01, 1.10) | 0.013 |
| Hypertension_FALSE | ESI | 1.23 (1.15, 1.31) | <0.001 | 1.21 (1.14, 1.30) | <0.001 | 1.19 (1.11, 1.27) | <0.001 | 1.18 (1.10, 1.26) | <0.001 |
| Hypertension_FALSE | ESIQ |  |  |  |  |  |  |  |  |
| Hypertension_FALSE | Q1 | ref | ref | ref | ref | ref | ref | ref | ref |
| Hypertension_FALSE | Q2 | 1.32 (0.88, 1.99) | 0.2 | 1.30 (0.86, 1.96) | 0.2 | 1.25 (0.83, 1.89) | 0.3 | 1.27 (0.84, 1.93) | 0.3 |
| Hypertension_FALSE | Q3 | 1.84 (1.25, 2.71) | 0.002 | 1.74 (1.17, 2.58) | 0.006 | 1.69 (1.14, 2.51) | 0.009 | 1.66 (1.11, 2.47) | 0.014 |
| Hypertension_FALSE | Q4 | 2.12 (1.47, 3.06) | <0.001 | 2.03 (1.40, 2.94) | <0.001 | 1.76 (1.20, 2.58) | 0.004 | 1.68 (1.14, 2.48) | 0.009 |
| Hypertension_FALSE | RDWCV | 1.09 (1.06, 1.12) | <0.001 | 1.09 (1.06, 1.12) | <0.001 | 1.08 (1.05, 1.11) | <0.001 | 1.07 (1.04, 1.10) | <0.001 |
| Hypertension_FALSE | MCHC | 0.99 (0.98, 0.99) | <0.001 | 0.99 (0.99, 0.99) | <0.001 | 0.99 (0.99, 1.00) | <0.001 | 0.99 (0.99, 1.00) | <0.001 |
| Hypertension_FALSE | ePVS | 1.10 (1.04, 1.17) | 0.002 | 1.09 (1.02, 1.16) | 0.007 | 1.05 (0.97, 1.14) | 0.2 | 1.03 (0.95, 1.13) | 0.4 |
| Hyperlipidemia_FALSE | ESI | 1.24 (1.20, 1.29) | <0.001 | 1.24 (1.19, 1.29) | <0.001 | 1.22 (1.17, 1.27) | <0.001 | 1.20 (1.15, 1.25) | <0.001 |
| Hyperlipidemia_FALSE | ESIQ |  |  |  |  |  |  |  |  |
| Hyperlipidemia_FALSE | Q1 | ref | ref | ref | ref | ref | ref | ref | ref |
| Hyperlipidemia_FALSE | Q2 | 1.48 (1.18, 1.86) | <0.001 | 1.45 (1.15, 1.82) | 0.001 | 1.40 (1.11, 1.76) | 0.004 | 1.38 (1.10, 1.73) | 0.006 |
| Hyperlipidemia_FALSE | Q3 | 1.93 (1.55, 2.39) | <0.001 | 1.85 (1.49, 2.31) | <0.001 | 1.79 (1.44, 2.23) | <0.001 | 1.68 (1.35, 2.09) | <0.001 |
| Hyperlipidemia_FALSE | Q4 | 2.32 (1.88, 2.86) | <0.001 | 2.22 (1.80, 2.74) | <0.001 | 2.01 (1.62, 2.49) | <0.001 | 1.83 (1.47, 2.27) | <0.001 |
| Hyperlipidemia_FALSE | RDWCV | 1.08 (1.07, 1.10) | <0.001 | 1.08 (1.06, 1.10) | <0.001 | 1.07 (1.06, 1.09) | <0.001 | 1.07 (1.05, 1.09) | <0.001 |
| Hyperlipidemia_FALSE | MCHC | 0.99 (0.98, 0.99) | <0.001 | 0.99 (0.98, 0.99) | <0.001 | 0.99 (0.99, 0.99) | <0.001 | 0.99 (0.99, 0.99) | <0.001 |
| Hyperlipidemia_FALSE | ePVS | 1.10 (1.07, 1.13) | <0.001 | 1.11 (1.07, 1.14) | <0.001 | 1.06 (1.02, 1.11) | 0.003 | 1.02 (0.98, 1.07) | 0.4 |
| Hyperlipidemia_TRUE | ESI | 1.31 (1.20, 1.44) | <0.001 | 1.33 (1.22, 1.46) | <0.001 | 1.34 (1.22, 1.48) | <0.001 | 1.32 (1.20, 1.46) | <0.001 |
| Hyperlipidemia_TRUE | ESIQ |  |  |  |  |  |  |  |  |
| Hyperlipidemia_TRUE | Q1 | ref | ref | ref | ref | ref | ref | ref | ref |
| Hyperlipidemia_TRUE | Q2 | 1.29 (0.83, 1.99) | 0.3 | 1.23 (0.80, 1.92) | 0.3 | 1.24 (0.80, 1.93) | 0.3 | 1.28 (0.82, 2.00) | 0.3 |
| Hyperlipidemia_TRUE | Q3 | 2.42 (1.60, 3.66) | <0.001 | 2.33 (1.54, 3.53) | <0.001 | 2.16 (1.42, 3.30) | <0.001 | 2.23 (1.46, 3.41) | <0.001 |
| Hyperlipidemia_TRUE | Q4 | 1.67 (1.08, 2.58) | 0.021 | 1.62 (1.04, 2.51) | 0.032 | 1.51 (0.96, 2.36) | 0.075 | 1.44 (0.91, 2.28) | 0.12 |
| Hyperlipidemia_TRUE | RDWCV | 1.10 (1.06, 1.14) | <0.001 | 1.11 (1.07, 1.14) | <0.001 | 1.11 (1.07, 1.15) | <0.001 | 1.11 (1.07, 1.15) | <0.001 |
| Hyperlipidemia_TRUE | MCHC | 0.99 (0.98, 0.99) | <0.001 | 0.99 (0.98, 1.0) | <0.001 | 0.99 (0.99, 1.00) | <0.001 | 0.99 (0.99, 1.00) | 0.002 |
| Hyperlipidemia_TRUE | ePVS | 1.39 (1.27, 1.53) | <0.001 | 1.40 (1.27, 1.55) | <0.001 | 1.43 (1.25, 1.64) | <0.001 | 1.39 (1.20, 1.60) | <0.001 |
| Anemia_FALSE | ESI | 1.27 (1.22, 1.32) | <0.001 | 1.26 (1.21, 1.31) | <0.001 | 1.26 (1.21, 1.30) | <0.001 | 1.24 (1.19, 1.28) | <0.001 |
| Anemia_FALSE | ESIQ |  |  |  |  |  |  |  |  |
| Anemia_FALSE | Q1 | ref | ref | ref | ref | ref | ref | ref | ref |
| Anemia_FALSE | Q2 | 1.44 (1.16, 1.78) | <0.001 | 1.40 (1.13, 1.74) | 0.002 | 1.41 (1.14, 1.74) | 0.002 | 1.39 (1.12, 1.72) | 0.002 |
| Anemia_FALSE | Q3 | 2.01 (1.64, 2.46) | <0.001 | 1.92 (1.57, 2.36) | <0.001 | 1.94 (1.58, 2.39) | <0.001 | 1.85 (1.51, 2.28) | <0.001 |
| Anemia_FALSE | Q4 | 2.20 (1.80, 2.69) | <0.001 | 2.09 (1.70, 2.56) | <0.001 | 2.11 (1.72, 2.58) | <0.001 | 1.92 (1.56, 2.36) | <0.001 |
| Anemia_FALSE | RDWCV | 1.09 (1.07, 1.11) | <0.001 | 1.09 (1.07, 1.10) | <0.001 | 1.09 (1.07, 1.10) | <0.001 | 1.08 (1.06, 1.10) | <0.001 |
| Anemia_FALSE | MCHC | 0.99 (0.98, 0.99) | <0.001 | 0.99 (0.98, 0.99) | <0.001 | 0.99 (0.98, 0.99) | <0.001 | 0.99 (0.98, 0.99) | <0.001 |
| Anemia_FALSE | ePVS | 1.12 (1.05, 1.18) | <0.001 | 1.10 (1.03, 1.17) | 0.004 | 1.12 (1.05, 1.19) | <0.001 | 1.05 (0.98, 1.12) | 0.2 |
| Anemia_TRUE | ESI | 1.05 (0.95, 1.17) | 0.3 | 1.08 (0.97, 1.20) | 0.2 | 1.09 (0.98, 1.22) | 0.11 | 1.09 (0.97, 1.23) | 0.13 |
| Anemia_TRUE | ESIQ |  |  |  |  |  |  |  |  |
| Anemia_TRUE | Q1 | ref | ref | ref | ref | ref | ref | ref | ref |
| Anemia_TRUE | Q2 | 1.41 (0.73, 2.73) | 0.3 | 1.24 (0.63, 2.42) | 0.5 | 1.20 (0.61, 2.36) | 0.6 | 1.33 (0.67, 2.63) | 0.4 |
| Anemia_TRUE | Q3 | 1.37 (0.76, 2.49) | 0.3 | 1.25 (0.68, 2.28) | 0.5 | 1.30 (0.71, 2.38) | 0.4 | 1.33 (0.72, 2.47) | 0.4 |
| Anemia_TRUE | Q4 | 1.23 (0.70, 2.16) | 0.5 | 1.14 (0.64, 2.01) | 0.7 | 1.17 (0.65, 2.08) | 0.6 | 1.20 (0.66, 2.17) | 0.6 |
| Anemia_TRUE | RDWCV | 1.02 (0.98, 1.07) | 0.3 | 1.04 (0.99, 1.09) | 0.2 | 1.04 (0.99, 1.09) | 0.085 | 1.04 (0.99, 1.10) | 0.085 |
| Anemia_TRUE | MCHC | 1.00 (0.99, 1.00) | 0.2 | 1.00 (0.99, 1.00) | 0.2 | 1.00 (0.99, 1.00) | 0.2 | 1.00 (0.99, 1.00) | 0.3 |
| Anemia_TRUE | ePVS | 1.05 (0.99, 1.10) | 0.083 | 1.06 (1.01, 1.11) | 0.026 | 1.07 (1.01, 1.12) | 0.015 | 1.05 (0.99, 1.11) | 0.094 |
| Hyperuricemia_FALSE | ESI | 1.25 (1.21, 1.29) | <0.001 | 1.25 (1.21, 1.29) | <0.001 | 1.23 (1.19, 1.28) | <0.001 | 1.21 (1.17, 1.26) | <0.001 |
| Hyperuricemia_FALSE | ESIQ |  |  |  |  |  |  |  |  |
| Hyperuricemia_FALSE | Q1 | ref | ref | ref | ref | ref | ref | ref | ref |
| Hyperuricemia_FALSE | Q2 | 1.43 (1.16, 1.76) | <0.001 | 1.39 (1.13, 1.71) | 0.002 | 1.37 (1.11, 1.69) | 0.003 | 1.37 (1.11, 1.68) | 0.003 |
| Hyperuricemia_FALSE | Q3 | 2.08 (1.71, 2.53) | <0.001 | 2.00 (1.64, 2.44) | <0.001 | 1.94 (1.59, 2.37) | <0.001 | 1.86 (1.52, 2.27) | <0.001 |
| Hyperuricemia_FALSE | Q4 | 2.21 (1.82, 2.68) | <0.001 | 2.13 (1.75, 2.59) | <0.001 | 1.96 (1.61, 2.39) | <0.001 | 1.81 (1.48, 2.21) | <0.001 |
| Hyperuricemia_FALSE | RDWCV | 1.09 (1.07, 1.10) | <0.001 | 1.09 (1.07, 1.10) | <0.001 | 1.08 (1.06, 1.10) | <0.001 | 1.07 (1.06, 1.09) | <0.001 |
| Hyperuricemia_FALSE | MCHC | 0.99 (0.98, 0.99) | <0.001 | 0.99 (0.98, 0.99) | <0.001 | 0.99 (0.99, 0.99) | <0.001 | 0.99 (0.99, 0.99) | <0.001 |
| Hyperuricemia_FALSE | ePVS | 1.13 (1.10, 1.17) | <0.001 | 1.14 (1.10, 1.18) | <0.001 | 1.10 (1.05, 1.15) | <0.001 | 1.06 (1.01, 1.11) | 0.026 |
| Hyperuricemia_TRUE | ESI | 1.42 (1.18, 1.69) | <0.001 | 1.39 (1.15, 1.66) | <0.001 | 1.54 (1.25, 1.91) | <0.001 | 1.55 (1.24, 1.94) | <0.001 |
| Hyperuricemia_TRUE | ESIQ |  |  |  |  |  |  |  |  |
| Hyperuricemia_TRUE | Q1 | ref | ref | ref | ref | ref | ref | ref | ref |
| Hyperuricemia_TRUE | Q2 | 1.89 (0.82, 4.35) | 0.14 | 1.81 (0.78, 4.17) | 0.2 | 1.74 (0.74, 4.12) | 0.2 | 1.76 (0.74, 4.22) | 0.2 |
| Hyperuricemia_TRUE | Q3 | 1.17 (0.49, 2.82) | 0.7 | 1.06 (0.43, 2.57) | >0.9 | 1.06 (0.42, 2.63) | >0.9 | 1.08 (0.42, 2.80) | 0.9 |
| Hyperuricemia_TRUE | Q4 | 2.41 (1.13, 5.16) | 0.023 | 2.05 (0.93, 4.53) | 0.076 | 2.13 (0.90, 5.01) | 0.085 | 2.09 (0.85, 5.13) | 0.11 |
| Hyperuricemia_TRUE | RDWCV | 1.11 (1.04, 1.19) | 0.002 | 1.11 (1.03, 1.19) | 0.005 | 1.16 (1.07, 1.26) | <0.001 | 1.17 (1.07, 1.27) | <0.001 |
| Hyperuricemia_TRUE | MCHC | 0.98 (0.97, 0.99) | <0.001 | 0.98 (0.98, 0.99) | 0.002 | 0.98 (0.97, 0.99) | 0.003 | 0.98 (0.97, 0.99) | 0.003 |
| Hyperuricemia_TRUE | ePVS | 1.10 (1.04, 1.16) | 0.001 | 1.08 (1.02, 1.15) | 0.007 | 1.06 (0.98, 1.14) | 0.13 | 1.08 (0.99, 1.18) | 0.080 |

**#The primary adjusted methods were: Model 1: no covariate included, Model 2: age + sex, Model 3: Model 2 + AF + ASCVD + CKD + Hypertension + Hyperlipidemia+ Anemia+ Hyperuricemia+COPD, Model 4: Model 3 + MONO + BASO + EOS + ALB + APTT. In particular, the subgroup variables were eliminated when adjusted. For example, when sex subgroups were processed, the adjusted methods deleted the covariant variable “sex”.**

# Table S7. The subgroup Cox regression of the T2D-derived HF patients in MIMIC

| Subgroup | Characteristic | Model 1 |  | Model 2 |  | Model 3 |  | Model 4 |  |
| --- | --- | --- | --- | --- | --- | --- | --- | --- | --- |
|  |  | HR (95% CI) | *P* value | HR (95% CI) | *P* value | HR (95% CI) | *P* value | HR (95% CI) | *P* value |
| Age > 60 years | ESI | 1.37 (1.29, 1.46) | <0.001 | 1.39 (1.30, 1.48) | <0.001 | 1.28 (1.19, 1.38) | <0.001 | 1.26 (1.17, 1.36) | <0.001 |
| Age > 60 years | ESIQ |  |  |  |  |  |  |  |  |
| Age > 60 years | Q1 | ref | ref | ref | ref | ref | ref | ref | ref |
| Age > 60 years | Q2 | 1.16 (1.01, 1.33) | 0.030 | 1.15 (1.01, 1.32) | 0.037 | 1.10 (0.96, 1.26) | 0.2 | 1.12 (0.98, 1.28) | 0.10 |
| Age > 60 years | Q3 | 1.49 (1.31, 1.70) | <0.001 | 1.47 (1.30, 1.68) | <0.001 | 1.33 (1.17, 1.52) | <0.001 | 1.35 (1.18, 1.54) | <0.001 |
| Age > 60 years | Q4 | 2.05 (1.80, 2.34) | <0.001 | 2.06 (1.80, 2.34) | <0.001 | 1.70 (1.49, 1.95) | <0.001 | 1.67 (1.46, 1.92) | <0.001 |
| Age > 60 years | RDWCV | 1.11 (1.08, 1.14) | <0.001 | 1.11 (1.09, 1.14) | <0.001 | 1.08 (1.05, 1.11) | <0.001 | 1.07 (1.04, 1.10) | <0.001 |
| Age > 60 years | MCHC | 0.99 (0.98, 0.99) | <0.001 | 0.99 (0.98, 0.99) | <0.001 | 0.99 (0.99, 0.99) | <0.001 | 0.99 (0.99, 0.99) | <0.001 |
| Age > 60 years | ePVS | 1.09 (1.06, 1.12) | <0.001 | 1.09 (1.06, 1.12) | <0.001 | 1.05 (1.02, 1.08) | 0.003 | 1.03 (1.00, 1.06) | 0.050 |
| Age ≤ 60 years | ESI | 1.40 (1.26, 1.55) | <0.001 | 1.42 (1.27, 1.57) | <0.001 | 1.33 (1.19, 1.49) | <0.001 | 1.31 (1.16, 1.46) | <0.001 |
| Age ≤ 60 years | ESIQ |  |  |  |  |  |  |  |  |
| Age ≤ 60 years | Q1 | ref | ref | ref | ref | ref | ref | ref | ref |
| Age ≤ 60 years | Q2 | 1.10 (0.88, 1.37) | 0.4 | 1.12 (0.90, 1.40) | 0.3 | 1.10 (0.88, 1.37) | 0.4 | 1.05 (0.84, 1.31) | 0.7 |
| Age ≤ 60 years | Q3 | 1.50 (1.22, 1.86) | <0.001 | 1.53 (1.24, 1.90) | <0.001 | 1.42 (1.14, 1.76) | 0.002 | 1.37 (1.11, 1.71) | 0.004 |
| Age ≤ 60 years | Q4 | 1.75 (1.42, 2.16) | <0.001 | 1.82 (1.48, 2.25) | <0.001 | 1.65 (1.33, 2.05) | <0.001 | 1.57 (1.26, 1.96) | <0.001 |
| Age ≤ 60 years | RDWCV | 1.12 (1.07, 1.16) | <0.001 | 1.12 (1.07, 1.16) | <0.001 | 1.09 (1.04, 1.13) | <0.001 | 1.07 (1.03, 1.12) | 0.002 |
| Age ≤ 60 years | MCHC | 0.99 (0.98, 0.99) | <0.001 | 0.99 (0.98, 0.99) | <0.001 | 0.99 (0.98, 0.99) | <0.001 | 0.99 (0.98, 0.99) | <0.001 |
| Age ≤ 60 years | ePVS | 1.14 (1.09, 1.19) | <0.001 | 1.16 (1.11, 1.20) | <0.001 | 1.13 (1.07, 1.18) | <0.001 | 1.10 (1.04, 1.15) | <0.001 |
| sex_Male | ESI | 1.41 (1.31, 1.52) | <0.001 | 1.41 (1.30, 1.52) | <0.001 | 1.33 (1.22, 1.45) | <0.001 | 1.30 (1.19, 1.42) | <0.001 |
| sex_Male | ESIQ |  |  |  |  |  |  |  |  |
| sex_Male | Q1 | ref | ref | ref | ref | ref | ref | ref | ref |
| sex_Male | Q2 | 1.30 (1.12, 1.51) | <0.001 | 1.17 (1.01, 1.36) | 0.036 | 1.15 (0.99, 1.34) | 0.070 | 1.14 (0.98, 1.33) | 0.082 |
| sex_Male | Q3 | 1.74 (1.51, 2.02) | <0.001 | 1.54 (1.33, 1.78) | <0.001 | 1.41 (1.21, 1.64) | <0.001 | 1.41 (1.21, 1.64) | <0.001 |
| sex_Male | Q4 | 2.21 (1.91, 2.57) | <0.001 | 2.08 (1.79, 2.41) | <0.001 | 1.79 (1.53, 2.10) | <0.001 | 1.71 (1.46, 2.01) | <0.001 |
| sex_Male | RDWCV | 1.11 (1.08, 1.14) | <0.001 | 1.11 (1.08, 1.15) | <0.001 | 1.08 (1.05, 1.12) | <0.001 | 1.07 (1.04, 1.11) | <0.001 |
| sex_Male | MCHC | 0.99 (0.98, 0.99) | <0.001 | 0.99 (0.98, 0.99) | <0.001 | 0.99 (0.99, 0.99) | <0.001 | 0.99 (0.98, 0.99) | <0.001 |
| sex_Male | ePVS | 1.14 (1.11, 1.17) | <0.001 | 1.13 (1.10, 1.17) | <0.001 | 1.09 (1.05, 1.13) | <0.001 | 1.07 (1.03, 1.11) | <0.001 |
| sex_Female | ESI | 1.39 (1.29, 1.50) | <0.001 | 1.38 (1.28, 1.49) | <0.001 | 1.27 (1.17, 1.38) | <0.001 | 1.25 (1.15, 1.37) | <0.001 |
| sex_Female | ESIQ |  |  |  |  |  |  |  |  |
| sex_Female | Q1 | ref | ref | ref | ref | ref | ref | ref | ref |
| sex_Female | Q2 | 1.12 (0.94, 1.34) | 0.2 | 1.09 (0.91, 1.30) | 0.3 | 1.01 (0.85, 1.21) | 0.9 | 1.02 (0.85, 1.22) | 0.8 |
| sex_Female | Q3 | 1.51 (1.27, 1.78) | <0.001 | 1.41 (1.19, 1.67) | <0.001 | 1.25 (1.05, 1.48) | 0.010 | 1.25 (1.06, 1.49) | 0.010 |
| sex_Female | Q4 | 1.93 (1.64, 2.28) | <0.001 | 1.89 (1.60, 2.23) | <0.001 | 1.53 (1.29, 1.81) | <0.001 | 1.51 (1.27, 1.80) | <0.001 |
| sex_Female | RDWCV | 1.12 (1.08, 1.15) | <0.001 | 1.12 (1.08, 1.15) | <0.001 | 1.08 (1.05, 1.11) | <0.001 | 1.07 (1.04, 1.11) | <0.001 |
| sex_Female | MCHC | 0.99 (0.98, 0.99) | <0.001 | 0.99 (0.98, 0.99) | <0.001 | 0.99 (0.99, 1.0) | <0.001 | 0.99 (0.99, 0.99) | <0.001 |
| sex_Female | ePVS | 1.10 (1.07, 1.14) | <0.001 | 1.08 (1.04, 1.11) | <0.001 | 1.04 (1.00, 1.08) | 0.045 | 1.03 (0.99, 1.07) | 0.2 |
| Hyperuricemia_TRUE | ESI | 1.47 (1.22, 1.77) | <0.001 | 1.52 (1.26, 1.83) | <0.001 | 1.34 (1.09, 1.65) | 0.006 | 1.23 (0.99, 1.53) | 0.065 |
| Hyperuricemia_TRUE | ESIQ |  |  |  |  |  |  |  |  |
| Hyperuricemia_TRUE | Q1 | ref | ref | ref | ref | ref | ref | ref | ref |
| Hyperuricemia_TRUE | Q2 | 1.19 (0.72, 1.95) | 0.5 | 1.24 (0.75, 2.04) | 0.4 | 1.12 (0.67, 1.87) | 0.7 | 1.13 (0.68, 1.90) | 0.6 |
| Hyperuricemia_TRUE | Q3 | 1.62 (1.03, 2.54) | 0.036 | 1.57 (1.00, 2.47) | 0.050 | 1.31 (0.82, 2.09) | 0.3 | 1.32 (0.83, 2.12) | 0.2 |
| Hyperuricemia_TRUE | Q4 | 2.45 (1.60, 3.76) | <0.001 | 2.49 (1.61, 3.84) | <0.001 | 1.92 (1.21, 3.04) | 0.006 | 1.78 (1.11, 2.85) | 0.017 |
| Hyperuricemia_TRUE | RDWCV | 1.14 (1.07, 1.22) | <0.001 | 1.14 (1.07, 1.22) | <0.001 | 1.10 (1.02, 1.18) | 0.009 | 1.07 (0.99, 1.15) | 0.078 |
| Hyperuricemia_TRUE | MCHC | 0.99 (0.98, 1.00) | 0.020 | 0.98 (0.97, 0.99) | 0.002 | 0.99 (0.98, 1.00) | 0.2 | 0.99 (0.98, 1.01) | 0.3 |
| Hyperuricemia_TRUE | ePVS | 1.08 (1.01, 1.17) | 0.037 | 1.10 (1.02, 1.19) | 0.013 | 1.07 (0.99, 1.17) | 0.10 | 1.03 (0.94, 1.13) | 0.5 |
| Hyperuricemia_FALSE | ESI | 1.36 (1.29, 1.44) | <0.001 | 1.37 (1.30, 1.46) | <0.001 | 1.30 (1.22, 1.38) | <0.001 | 1.28 (1.20, 1.36) | <0.001 |
| Hyperuricemia_FALSE | ESIQ |  |  |  |  |  |  |  |  |
| Hyperuricemia_FALSE | Q1 | ref | ref | ref | ref | ref | ref | ref | ref |
| Hyperuricemia_FALSE | Q2 | 1.21 (1.07, 1.36) | 0.002 | 1.13 (1.01, 1.27) | 0.038 | 1.09 (0.97, 1.22) | 0.2 | 1.09 (0.97, 1.23) | 0.15 |
| Hyperuricemia_FALSE | Q3 | 1.58 (1.41, 1.78) | <0.001 | 1.46 (1.30, 1.64) | <0.001 | 1.35 (1.20, 1.51) | <0.001 | 1.34 (1.20, 1.51) | <0.001 |
| Hyperuricemia_FALSE | Q4 | 1.94 (1.73, 2.17) | <0.001 | 1.90 (1.69, 2.14) | <0.001 | 1.65 (1.47, 1.86) | <0.001 | 1.61 (1.43, 1.82) | <0.001 |
| Hyperuricemia_FALSE | RDWCV | 1.10 (1.08, 1.13) | <0.001 | 1.11 (1.08, 1.13) | <0.001 | 1.08 (1.06, 1.11) | <0.001 | 1.07 (1.05, 1.10) | <0.001 |
| Hyperuricemia_FALSE | MCHC | 0.99 (0.98, 0.99) | <0.001 | 0.99 (0.98, 0.99) | <0.001 | 0.99 (0.99, 0.99) | <0.001 | 0.99 (0.99, 0.99) | <0.001 |
| Hyperuricemia_FALSE | ePVS | 1.11 (1.09, 1.14) | <0.001 | 1.10 (1.08, 1.13) | <0.001 | 1.07 (1.04, 1.09) | <0.001 | 1.05 (1.02, 1.08) | <0.001 |
| Anemia_TRUE | ESI | 1.15 (1.05, 1.25) | 0.002 | 1.17 (1.07, 1.28) | <0.001 | 1.15 (1.05, 1.26) | 0.003 | 1.14 (1.03, 1.25) | 0.009 |
| Anemia_TRUE | ESIQ |  |  |  |  |  |  |  |  |
| Anemia_TRUE | Q1 | ref | ref | ref | ref | ref | ref | ref | ref |
| Anemia_TRUE | Q2 | 0.98 (0.78, 1.24) | 0.9 | 0.92 (0.72, 1.16) | 0.5 | 0.87 (0.69, 1.10) | 0.2 | 0.88 (0.70, 1.12) | 0.3 |
| Anemia_TRUE | Q3 | 1.18 (0.95, 1.47) | 0.14 | 1.11 (0.89, 1.39) | 0.3 | 1.01 (0.80, 1.26) | >0.9 | 1.03 (0.82, 1.29) | 0.8 |
| Anemia_TRUE | Q4 | 1.43 (1.16, 1.75) | <0.001 | 1.40 (1.14, 1.72) | 0.001 | 1.26 (1.02, 1.55) | 0.031 | 1.23 (1.00, 1.52) | 0.051 |
| Anemia_TRUE | RDWCV | 1.04 (1.01, 1.08) | 0.014 | 1.05 (1.01, 1.08) | 0.005 | 1.04 (1.01, 1.08) | 0.021 | 1.03 (1.00, 1.07) | 0.058 |
| Anemia_TRUE | MCHC | 0.99 (0.99, 1.00) | <0.001 | 0.99 (0.99, 1.00) | <0.001 | 0.99 (0.99, 1.00) | 0.003 | 0.99 (0.99, 1.00) | 0.003 |
| Anemia_TRUE | ePVS | 1.04 (1.01, 1.08) | 0.022 | 1.05 (1.01, 1.09) | 0.016 | 1.04 (1.00, 1.08) | 0.033 | 1.03 (0.99, 1.07) | 0.14 |
| Anemia_FALSE | ESI | 1.50 (1.39, 1.61) | <0.001 | 1.50 (1.40, 1.62) | <0.001 | 1.43 (1.32, 1.55) | <0.001 | 1.38 (1.28, 1.50) | <0.001 |
| Anemia_FALSE | ESIQ |  |  |  |  |  |  |  |  |
| Anemia_FALSE | Q1 | ref | ref | ref | ref | ref | ref | ref | ref |
| Anemia_FALSE | Q2 | 1.26 (1.10, 1.43) | <0.001 | 1.19 (1.04, 1.35) | 0.010 | 1.16 (1.02, 1.32) | 0.027 | 1.15 (1.01, 1.31) | 0.039 |
| Anemia_FALSE | Q3 | 1.71 (1.51, 1.94) | <0.001 | 1.56 (1.37, 1.77) | <0.001 | 1.45 (1.28, 1.65) | <0.001 | 1.43 (1.25, 1.62) | <0.001 |
| Anemia_FALSE | Q4 | 2.13 (1.86, 2.43) | <0.001 | 2.09 (1.83, 2.40) | <0.001 | 1.86 (1.61, 2.13) | <0.001 | 1.80 (1.56, 2.07) | <0.001 |
| Anemia_FALSE | RDWCV | 1.14 (1.11, 1.17) | <0.001 | 1.14 (1.11, 1.17) | <0.001 | 1.11 (1.08, 1.15) | <0.001 | 1.10 (1.07, 1.13) | <0.001 |
| Anemia_FALSE | MCHC | 0.99 (0.98, 0.99) | <0.001 | 0.99 (0.98, 0.99) | <0.001 | 0.99 (0.98, 0.99) | <0.001 | 0.99 (0.98, 0.99) | <0.001 |
| Anemia_FALSE | ePVS | 1.12 (1.09, 1.16) | <0.001 | 1.10 (1.07, 1.14) | <0.001 | 1.09 (1.05, 1.12) | <0.001 | 1.06 (1.02, 1.10) | 0.001 |
| AF_FALSE | ESI | 1.35 (1.28, 1.44) | <0.001 | 1.37 (1.29, 1.46) | <0.001 | 1.29 (1.21, 1.38) | <0.001 | 1.27 (1.18, 1.36) | <0.001 |
| AF_FALSE | ESIQ |  |  |  |  |  |  |  |  |
| AF_FALSE | Q1 | ref | ref | ref | ref | ref | ref | ref | ref |
| AF_FALSE | Q2 | 1.20 (1.06, 1.36) | 0.004 | 1.14 (1.01, 1.29) | 0.037 | 1.11 (0.98, 1.25) | 0.11 | 1.11 (0.98, 1.25) | 0.11 |
| AF_FALSE | Q3 | 1.58 (1.40, 1.78) | <0.001 | 1.47 (1.30, 1.66) | <0.001 | 1.38 (1.22, 1.56) | <0.001 | 1.38 (1.22, 1.56) | <0.001 |
| AF_FALSE | Q4 | 1.93 (1.71, 2.18) | <0.001 | 1.93 (1.71, 2.18) | <0.001 | 1.70 (1.50, 1.93) | <0.001 | 1.65 (1.45, 1.88) | <0.001 |
| AF_FALSE | RDWCV | 1.10 (1.08, 1.13) | <0.001 | 1.11 (1.08, 1.13) | <0.001 | 1.08 (1.05, 1.11) | <0.001 | 1.07 (1.04, 1.10) | <0.001 |
| AF_FALSE | MCHC | 0.99 (0.99, 0.99) | <0.001 | 0.99 (0.98, 0.99) | <0.001 | 0.99 (0.99, 0.99) | <0.001 | 0.99 (0.99, 0.99) | <0.001 |
| AF_FALSE | ePVS | 1.12 (1.10, 1.15) | <0.001 | 1.12 (1.09, 1.15) | <0.001 | 1.08 (1.05, 1.11) | <0.001 | 1.06 (1.03, 1.09) | <0.001 |
| AF_TRUE | ESI | 1.41 (1.23, 1.61) | <0.001 | 1.37 (1.19, 1.56) | <0.001 | 1.31 (1.13, 1.51) | <0.001 | 1.30 (1.12, 1.51) | <0.001 |
| AF_TRUE | ESIQ |  |  |  |  |  |  |  |  |
| AF_TRUE | Q1 | ref | ref | ref | ref | ref | ref | ref | ref |
| AF_TRUE | Q2 | 0.99 (0.74, 1.34) | >0.9 | 0.95 (0.70, 1.28) | 0.7 | 0.95 (0.70, 1.29) | 0.8 | 0.97 (0.71, 1.32) | 0.9 |
| AF_TRUE | Q3 | 1.22 (0.92, 1.61) | 0.2 | 1.18 (0.89, 1.56) | 0.2 | 1.12 (0.84, 1.49) | 0.4 | 1.12 (0.84, 1.50) | 0.4 |
| AF_TRUE | Q4 | 1.73 (1.32, 2.28) | <0.001 | 1.64 (1.24, 2.16) | <0.001 | 1.51 (1.13, 2.02) | 0.005 | 1.46 (1.09, 1.96) | 0.011 |
| AF_TRUE | RDWCV | 1.12 (1.07, 1.18) | <0.001 | 1.11 (1.05, 1.17) | <0.001 | 1.09 (1.03, 1.15) | 0.002 | 1.08 (1.02, 1.15) | 0.005 |
| AF_TRUE | MCHC | 0.99 (0.98, 0.99) | <0.001 | 0.99 (0.98, 0.99) | <0.001 | 0.99 (0.98, 1.00) | 0.001 | 0.99 (0.98, 1.00) | 0.002 |
| AF_TRUE | ePVS | 1.06 (1.01, 1.11) | 0.023 | 1.04 (0.99, 1.10) | 0.12 | 1.02 (0.96, 1.08) | 0.6 | 1.01 (0.95, 1.07) | 0.8 |
| CKD_TRUE | ESI | 1.40 (1.29, 1.52) | <0.001 | 1.41 (1.30, 1.54) | <0.001 | 1.30 (1.19, 1.42) | <0.001 | 1.25 (1.14, 1.37) | <0.001 |
| CKD_TRUE | ESIQ |  |  |  |  |  |  |  |  |
| CKD_TRUE | Q1 | ref | ref | ref | ref | ref | ref | ref | ref |
| CKD_TRUE | Q2 | 1.21 (1.01, 1.46) | 0.043 | 1.13 (0.94, 1.36) | 0.2 | 1.08 (0.90, 1.31) | 0.4 | 1.07 (0.89, 1.30) | 0.5 |
| CKD_TRUE | Q3 | 1.54 (1.29, 1.83) | <0.001 | 1.43 (1.20, 1.71) | <0.001 | 1.29 (1.08, 1.54) | 0.005 | 1.27 (1.06, 1.52) | 0.008 |
| CKD_TRUE | Q4 | 2.02 (1.71, 2.40) | <0.001 | 1.94 (1.63, 2.29) | <0.001 | 1.67 (1.40, 1.99) | <0.001 | 1.57 (1.31, 1.87) | <0.001 |
| CKD_TRUE | RDWCV | 1.10 (1.07, 1.14) | <0.001 | 1.11 (1.07, 1.14) | <0.001 | 1.08 (1.04, 1.11) | <0.001 | 1.06 (1.03, 1.09) | <0.001 |
| CKD_TRUE | MCHC | 0.99 (0.98, 0.99) | <0.001 | 0.99 (0.98, 0.99) | <0.001 | 0.99 (0.99, 0.99) | <0.001 | 0.99 (0.99, 0.99) | <0.001 |
| CKD_TRUE | ePVS | 1.10 (1.07, 1.13) | <0.001 | 1.10 (1.07, 1.13) | <0.001 | 1.08 (1.04, 1.12) | <0.001 | 1.05 (1.02, 1.09) | 0.005 |
| CKD_FALSE | ESI | 1.28 (1.18, 1.38) | <0.001 | 1.29 (1.19, 1.40) | <0.001 | 1.29 (1.19, 1.41) | <0.001 | 1.32 (1.21, 1.43) | <0.001 |
| CKD_FALSE | ESIQ |  |  |  |  |  |  |  |  |
| CKD_FALSE | Q1 | ref | ref | ref | ref | ref | ref | ref | ref |
| CKD_FALSE | Q2 | 1.16 (1.00, 1.34) | 0.044 | 1.11 (0.96, 1.28) | 0.2 | 1.10 (0.95, 1.27) | 0.2 | 1.10 (0.95, 1.27) | 0.2 |
| CKD_FALSE | Q3 | 1.51 (1.31, 1.74) | <0.001 | 1.39 (1.20, 1.60) | <0.001 | 1.37 (1.18, 1.58) | <0.001 | 1.37 (1.18, 1.58) | <0.001 |
| CKD_FALSE | Q4 | 1.66 (1.42, 1.93) | <0.001 | 1.69 (1.44, 1.97) | <0.001 | 1.68 (1.43, 1.96) | <0.001 | 1.70 (1.45, 1.99) | <0.001 |
| CKD_FALSE | RDWCV | 1.09 (1.06, 1.12) | <0.001 | 1.09 (1.06, 1.13) | <0.001 | 1.09 (1.05, 1.12) | <0.001 | 1.09 (1.05, 1.13) | <0.001 |
| CKD_FALSE | MCHC | 0.99 (0.99, 1.0) | <0.001 | 0.99 (0.99, 1.0) | <0.001 | 0.99 (0.99, 0.99) | <0.001 | 0.99 (0.99, 0.99) | <0.001 |
| CKD_FALSE | ePVS | 1.07 (1.03, 1.10) | <0.001 | 1.05 (1.01, 1.09) | 0.006 | 1.05 (1.01, 1.09) | 0.020 | 1.04 (1.00, 1.08) | 0.064 |
| Hypertension_FALSE | ESI | 1.51 (1.40, 1.64) | <0.001 | 1.49 (1.38, 1.62) | <0.001 | 1.35 (1.24, 1.48) | <0.001 | 1.29 (1.18, 1.41) | <0.001 |
| Hypertension_FALSE | ESIQ |  |  |  |  |  |  |  |  |
| Hypertension_FALSE | Q1 | ref | ref | ref | ref | ref | ref | ref | ref |
| Hypertension_FALSE | Q2 | 1.29 (1.07, 1.57) | 0.009 | 1.12 (0.92, 1.36) | 0.2 | 1.11 (0.91, 1.34) | 0.3 | 1.11 (0.92, 1.35) | 0.3 |
| Hypertension_FALSE | Q3 | 1.91 (1.60, 2.29) | <0.001 | 1.57 (1.31, 1.89) | <0.001 | 1.37 (1.14, 1.65) | <0.001 | 1.38 (1.15, 1.66) | <0.001 |
| Hypertension_FALSE | Q4 | 2.49 (2.10, 2.97) | <0.001 | 2.24 (1.88, 2.67) | <0.001 | 1.82 (1.52, 2.19) | <0.001 | 1.72 (1.43, 2.06) | <0.001 |
| Hypertension_FALSE | RDWCV | 1.14 (1.11, 1.17) | <0.001 | 1.14 (1.10, 1.17) | <0.001 | 1.10 (1.06, 1.13) | <0.001 | 1.08 (1.04, 1.11) | <0.001 |
| Hypertension_FALSE | MCHC | 0.98 (0.98, 0.99) | <0.001 | 0.98 (0.98, 0.99) | <0.001 | 0.99 (0.98, 0.99) | <0.001 | 0.99 (0.99, 0.99) | <0.001 |
| Hypertension_FALSE | ePVS | 1.14 (1.11, 1.18) | <0.001 | 1.13 (1.09, 1.17) | <0.001 | 1.07 (1.03, 1.11) | <0.001 | 1.04 (1.00, 1.08) | 0.042 |
| Hypertension_TRUE | ESI | 1.28 (1.19, 1.38) | <0.001 | 1.30 (1.20, 1.40) | <0.001 | 1.25 (1.15, 1.36) | <0.001 | 1.26 (1.16, 1.37) | <0.001 |
| Hypertension_TRUE | ESIQ |  |  |  |  |  |  |  |  |
| Hypertension_TRUE | Q1 | ref | ref | ref | ref | ref | ref | ref | ref |
| Hypertension_TRUE | Q2 | 1.16 (1.01, 1.34) | 0.038 | 1.13 (0.98, 1.31) | 0.083 | 1.07 (0.93, 1.24) | 0.3 | 1.08 (0.93, 1.25) | 0.3 |
| Hypertension_TRUE | Q3 | 1.43 (1.24, 1.65) | <0.001 | 1.38 (1.20, 1.59) | <0.001 | 1.31 (1.14, 1.51) | <0.001 | 1.32 (1.14, 1.52) | <0.001 |
| Hypertension_TRUE | Q4 | 1.70 (1.47, 1.97) | <0.001 | 1.71 (1.47, 1.98) | <0.001 | 1.55 (1.33, 1.81) | <0.001 | 1.57 (1.35, 1.83) | <0.001 |
| Hypertension_TRUE | RDWCV | 1.09 (1.05, 1.12) | <0.001 | 1.09 (1.06, 1.12) | <0.001 | 1.07 (1.03, 1.10) | <0.001 | 1.07 (1.03, 1.10) | <0.001 |
| Hypertension_TRUE | MCHC | 0.99 (0.99, 0.99) | <0.001 | 0.99 (0.99, 0.99) | <0.001 | 0.99 (0.99, 0.99) | <0.001 | 0.99 (0.99, 0.99) | <0.001 |
| Hypertension_TRUE | ePVS | 1.08 (1.04, 1.11) | <0.001 | 1.07 (1.03, 1.10) | <0.001 | 1.06 (1.02, 1.09) | 0.003 | 1.05 (1.01, 1.09) | 0.007 |
| ASCVD_TRUE | ESI | 1.47 (1.35, 1.60) | <0.001 | 1.45 (1.33, 1.58) | <0.001 | 1.32 (1.20, 1.45) | <0.001 | 1.29 (1.17, 1.42) | <0.001 |
| ASCVD_TRUE | ESIQ |  |  |  |  |  |  |  |  |
| ASCVD_TRUE | Q1 | ref | ref | ref | ref | ref | ref | ref | ref |
| ASCVD_TRUE | Q2 | 1.22 (1.03, 1.44) | 0.019 | 1.18 (1.00, 1.39) | 0.054 | 1.11 (0.94, 1.32) | 0.2 | 1.12 (0.95, 1.33) | 0.2 |
| ASCVD_TRUE | Q3 | 1.62 (1.38, 1.90) | <0.001 | 1.50 (1.28, 1.76) | <0.001 | 1.33 (1.13, 1.57) | <0.001 | 1.34 (1.14, 1.58) | <0.001 |
| ASCVD_TRUE | Q4 | 2.20 (1.87, 2.59) | <0.001 | 2.10 (1.78, 2.48) | <0.001 | 1.74 (1.46, 2.07) | <0.001 | 1.70 (1.42, 2.03) | <0.001 |
| ASCVD_TRUE | RDWCV | 1.12 (1.09, 1.16) | <0.001 | 1.12 (1.08, 1.15) | <0.001 | 1.08 (1.04, 1.12) | <0.001 | 1.07 (1.03, 1.11) | <0.001 |
| ASCVD_TRUE | MCHC | 0.98 (0.98, 0.99) | <0.001 | 0.98 (0.98, 0.99) | <0.001 | 0.99 (0.98, 0.99) | <0.001 | 0.99 (0.98, 0.99) | <0.001 |
| ASCVD_TRUE | ePVS | 1.10 (1.06, 1.14) | <0.001 | 1.08 (1.04, 1.12) | <0.001 | 1.04 (1.00, 1.08) | 0.033 | 1.03 (0.99, 1.07) | 0.2 |
| ASCVD_FALSE | ESI | 1.40 (1.30, 1.50) | <0.001 | 1.40 (1.31, 1.51) | <0.001 | 1.29 (1.19, 1.40) | <0.001 | 1.27 (1.17, 1.37) | <0.001 |
| ASCVD_FALSE | ESIQ |  |  |  |  |  |  |  |  |
| ASCVD_FALSE | Q1 | ref | ref | ref | ref | ref | ref | ref | ref |
| ASCVD_FALSE | Q2 | 1.20 (1.02, 1.40) | 0.027 | 1.11 (0.95, 1.30) | 0.2 | 1.05 (0.90, 1.23) | 0.5 | 1.05 (0.90, 1.23) | 0.6 |
| ASCVD_FALSE | Q3 | 1.62 (1.39, 1.88) | <0.001 | 1.48 (1.28, 1.73) | <0.001 | 1.34 (1.15, 1.56) | <0.001 | 1.33 (1.14, 1.55) | <0.001 |
| ASCVD_FALSE | Q4 | 2.04 (1.76, 2.37) | <0.001 | 1.98 (1.70, 2.30) | <0.001 | 1.63 (1.39, 1.90) | <0.001 | 1.57 (1.34, 1.84) | <0.001 |
| ASCVD_FALSE | RDWCV | 1.12 (1.09, 1.15) | <0.001 | 1.12 (1.09, 1.15) | <0.001 | 1.09 (1.05, 1.12) | <0.001 | 1.08 (1.04, 1.11) | <0.001 |
| ASCVD_FALSE | MCHC | 0.99 (0.98, 0.99) | <0.001 | 0.99 (0.98, 0.99) | <0.001 | 0.99 (0.99, 1.0) | <0.001 | 0.99 (0.99, 1.0) | <0.001 |
| ASCVD_FALSE | ePVS | 1.14 (1.11, 1.17) | <0.001 | 1.14 (1.10, 1.17) | <0.001 | 1.09 (1.05, 1.13) | <0.001 | 1.07 (1.03, 1.11) | <0.001 |
| Hyperlipidemia_TRUE | ESI | 1.38 (1.27, 1.50) | <0.001 | 1.38 (1.27, 1.51) | <0.001 | 1.25 (1.14, 1.38) | <0.001 | 1.26 (1.15, 1.39) | <0.001 |
| Hyperlipidemia_TRUE | ESIQ |  |  |  |  |  |  |  |  |
| Hyperlipidemia_TRUE | Q1 | ref | ref | ref | ref | ref | ref | ref | ref |
| Hyperlipidemia_TRUE | Q2 | 1.11 (0.94, 1.32) | 0.2 | 1.06 (0.89, 1.26) | 0.5 | 1.01 (0.85, 1.20) | 0.9 | 1.01 (0.85, 1.21) | 0.9 |
| Hyperlipidemia_TRUE | Q3 | 1.39 (1.18, 1.65) | <0.001 | 1.32 (1.12, 1.57) | 0.001 | 1.19 (1.00, 1.41) | 0.047 | 1.20 (1.01, 1.42) | 0.039 |
| Hyperlipidemia_TRUE | Q4 | 2.05 (1.73, 2.42) | <0.001 | 1.97 (1.66, 2.33) | <0.001 | 1.59 (1.33, 1.89) | <0.001 | 1.59 (1.33, 1.90) | <0.001 |
| Hyperlipidemia_TRUE | RDWCV | 1.13 (1.09, 1.17) | <0.001 | 1.13 (1.09, 1.17) | <0.001 | 1.09 (1.05, 1.13) | <0.001 | 1.08 (1.04, 1.12) | <0.001 |
| Hyperlipidemia_TRUE | MCHC | 0.99 (0.99, 0.99) | <0.001 | 0.99 (0.99, 0.99) | <0.001 | 0.99 (0.99, 1.00) | 0.003 | 0.99 (0.99, 1.00) | <0.001 |
| Hyperlipidemia_TRUE | ePVS | 1.11 (1.07, 1.15) | <0.001 | 1.11 (1.07, 1.14) | <0.001 | 1.05 (1.01, 1.09) | 0.013 | 1.03 (0.99, 1.08) | 0.10 |
| Hyperlipidemia_FALSE | ESI | 1.40 (1.30, 1.50) | <0.001 | 1.41 (1.31, 1.52) | <0.001 | 1.33 (1.23, 1.44) | <0.001 | 1.28 (1.18, 1.39) | <0.001 |
| Hyperlipidemia_FALSE | ESIQ |  |  |  |  |  |  |  |  |
| Hyperlipidemia_FALSE | Q1 | ref | ref | ref | ref | ref | ref | ref | ref |
| Hyperlipidemia_FALSE | Q2 | 1.29 (1.11, 1.51) | 0.001 | 1.21 (1.03, 1.41) | 0.018 | 1.15 (0.99, 1.35) | 0.074 | 1.16 (0.99, 1.35) | 0.068 |
| Hyperlipidemia_FALSE | Q3 | 1.79 (1.55, 2.08) | <0.001 | 1.61 (1.39, 1.87) | <0.001 | 1.47 (1.26, 1.70) | <0.001 | 1.46 (1.26, 1.70) | <0.001 |
| Hyperlipidemia_FALSE | Q4 | 2.09 (1.80, 2.42) | <0.001 | 2.05 (1.77, 2.38) | <0.001 | 1.76 (1.51, 2.05) | <0.001 | 1.67 (1.43, 1.96) | <0.001 |
| Hyperlipidemia_FALSE | RDWCV | 1.11 (1.08, 1.14) | <0.001 | 1.11 (1.08, 1.14) | <0.001 | 1.08 (1.05, 1.11) | <0.001 | 1.06 (1.03, 1.10) | <0.001 |
| Hyperlipidemia_FALSE | MCHC | 0.99 (0.98, 0.99) | <0.001 | 0.99 (0.98, 0.99) | <0.001 | 0.99 (0.98, 0.99) | <0.001 | 0.99 (0.98, 0.99) | <0.001 |
| Hyperlipidemia_FALSE | ePVS | 1.12 (1.09, 1.15) | <0.001 | 1.11 (1.07, 1.14) | <0.001 | 1.08 (1.04, 1.11) | <0.001 | 1.06 (1.02, 1.10) | <0.001 |

**#The primary adjusted methods were: Model 1: no covariate included, Model 2: age + sex, Model 3: Model 2 + AF + ASCVD + CKD + Hypertension + Hyperlipidemia +** **Anemia +** **Hyperuricemia, Model 4: Model 3 + Creatinine + Potassium + Sodium + WBC. Especially, the subgroup variable was eliminated when adjusted. For example, when sex subgroups were processed, the adjusted methods deleted the covariant variable “sex”.**
